# Supplementary material for: Quality of medical care and excess mortality in psychiatric patients—a nationwide register-based study in Sweden
Source: PubMed Central journal article supplement — BMJ Open. 2012 Feb 24;2(1):e000778. doi: 10.1136/bmjopen-2011-000778 (PMC3289986; doi:10.1136/bmjopen-2011-000778), 2012-02-24
Supplement: bmjopen-2011-000778-s1.pdf [file bmjopen-2011-000778-s1.pdf]

bmjopen-2011-000778 - Quality of medical care and excess mortality in psychiatric patients - a nationwide register-based study in Sweden  
STROBE Statement—Checklist of items that should be included in reports of *cohort studies*

|                              | Item No | Recommendation                                                                                                                                                                                                                                                                                                          |
|------------------------------|---------|-------------------------------------------------------------------------------------------------------------------------------------------------------------------------------------------------------------------------------------------------------------------------------------------------------------------------|
| <b>Title and abstract</b>    | 1       | (a) Indicate the study's design with a commonly used term in the title or the abstract<br><b>Page 1</b><br>(b) Provide in the abstract an informative and balanced summary of what was done and what was found<br><b>Page 3</b>                                                                                         |
| <b>Introduction</b>          |         |                                                                                                                                                                                                                                                                                                                         |
| Background/rationale         | 2       | Explain the scientific background and rationale for the investigation being reported<br><b>Page 4</b>                                                                                                                                                                                                                   |
| Objectives                   | 3       | State specific objectives, including any prespecified hypotheses<br><b>Page 5</b>                                                                                                                                                                                                                                       |
| <b>Methods</b>               |         |                                                                                                                                                                                                                                                                                                                         |
| Study design                 | 4       | Present key elements of study design early in the paper<br><b>Page 6</b>                                                                                                                                                                                                                                                |
| Setting                      | 5       | Describe the setting, locations, and relevant dates, including periods of recruitment, exposure, follow-up, and data collection<br><b>Page 6</b>                                                                                                                                                                        |
| Participants                 | 6       | (a) Give the eligibility criteria, and the sources and methods of selection of participants. Describe methods of follow-up<br><b>Page 6</b><br>(b) For matched studies, give matching criteria and number of exposed and unexposed<br>N/A                                                                               |
| Variables                    | 7       | Clearly define all outcomes, exposures, predictors, potential confounders, and effect modifiers. Give diagnostic criteria, if applicable<br><b>Page 6 - 8</b>                                                                                                                                                           |
| Data sources/<br>measurement | 8*      | For each variable of interest, give sources of data and details of methods of assessment (measurement). Describe comparability of assessment methods if there is more than one group<br><b>Page 6 - 8</b>                                                                                                               |
| Bias                         | 9       | Describe any efforts to address potential sources of bias<br>N/A                                                                                                                                                                                                                                                        |
| Study size                   | 10      | Explain how the study size was arrived at<br><b>Page 6</b>                                                                                                                                                                                                                                                              |
| Quantitative variables       | 11      | Explain how quantitative variables were handled in the analyses. If applicable, describe which groupings were chosen and why<br>N/A                                                                                                                                                                                     |
| Statistical methods          | 12      | (a) Describe all statistical methods, including those used to control for confounding<br><b>Page 8 - 9</b><br>(b) Describe any methods used to examine subgroups and interactions<br>N/A<br>(c) Explain how missing data were addressed<br>N/A<br>(d) If applicable, explain how loss to follow-up was addressed<br>N/A |

|                          |     |                                                                                                                                                                                                                                                                                                                                                                                                                                                                                            |
|--------------------------|-----|--------------------------------------------------------------------------------------------------------------------------------------------------------------------------------------------------------------------------------------------------------------------------------------------------------------------------------------------------------------------------------------------------------------------------------------------------------------------------------------------|
| <b>Results</b>           |     |                                                                                                                                                                                                                                                                                                                                                                                                                                                                                            |
| Participants             | 13* | <p>(a) Report numbers of individuals at each stage of study—eg numbers potentially eligible, examined for eligibility, confirmed eligible, included in the study, completing follow-up, and analysed</p> <p><b>Page 10 and page 20</b></p> <p>(b) Give reasons for non-participation at each stage</p> <p>N/A</p> <p>(c) Consider use of a flow diagram</p> <p>N/A</p>                                                                                                                     |
| Descriptive data         | 14* | <p>(a) Give characteristics of study participants (eg demographic, clinical, social) and information on exposures and potential confounders</p> <p><b>Page 20</b></p> <p>(b) Indicate number of participants with missing data for each variable of interest</p> <p>N/A</p> <p>(c) Summarise follow-up time (eg, average and total amount)</p> <p><b>Page 20</b></p>                                                                                                                       |
| Outcome data             | 15* | <p>Report numbers of outcome events or summary measures over time</p> <p><b>Page 10 and page 20</b></p>                                                                                                                                                                                                                                                                                                                                                                                    |
| Main results             | 16  | <p>(a) Give unadjusted estimates and, if applicable, confounder-adjusted estimates and their precision (eg, 95% confidence interval). Make clear which confounders were adjusted for and why they were included</p> <p><b>Page 10-11 and page 21-23</b></p> <p>(b) Report category boundaries when continuous variables were categorized</p> <p>N/A</p> <p>(c) If relevant, consider translating estimates of relative risk into absolute risk for a meaningful time period</p> <p>N/A</p> |
| Other analyses           | 17  | <p>Report other analyses done—eg analyses of subgroups and interactions, and sensitivity analyses</p> <p><b>Page 11 and page 24</b></p>                                                                                                                                                                                                                                                                                                                                                    |
| <b>Discussion</b>        |     |                                                                                                                                                                                                                                                                                                                                                                                                                                                                                            |
| Key results              | 18  | <p>Summarise key results with reference to study objectives</p> <p><b>Page 2 and page 12 – 16</b></p>                                                                                                                                                                                                                                                                                                                                                                                      |
| Limitations              | 19  | <p>Discuss limitations of the study, taking into account sources of potential bias or imprecision. Discuss both direction and magnitude of any potential bias</p> <p><b>Page 2 and page 12</b></p>                                                                                                                                                                                                                                                                                         |
| Interpretation           | 20  | <p>Give a cautious overall interpretation of results considering objectives, limitations, multiplicity of analyses, results from similar studies, and other relevant evidence</p> <p><b>Page 12 – 16</b></p>                                                                                                                                                                                                                                                                               |
| Generalisability         | 21  | <p>Discuss the generalisability (external validity) of the study results</p> <p><b>Page 15</b></p>                                                                                                                                                                                                                                                                                                                                                                                         |
| <b>Other information</b> |     |                                                                                                                                                                                                                                                                                                                                                                                                                                                                                            |
| Funding                  | 22  | <p>Give the source of funding and the role of the funders for the present study and, if applicable, for the original study on which the present article is based</p> <p><b>Page 16</b></p>                                                                                                                                                                                                                                                                                                 |

\*Give information separately for exposed and unexposed groups.
