# Supplementary material for: Quality of medical care and excess mortality in psychiatric patients—a nationwide register-based study in Sweden
Source: PubMed Central journal article supplement — BMJ Open. 2012 Feb 24;2(1):e000778. doi: 10.1136/bmjopen-2011-000778 (PMC3289986; doi:10.1136/bmjopen-2011-000778), 2012-02-24
Supplement: bmjopen-2011-000778.draft_revisions.pdf [file bmjopen-2011-000778.draft_revisions.pdf]

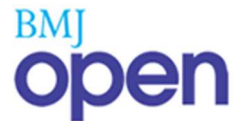

**Quality of medical care and excess mortality in psychiatric patients – a nationwide register-based study in Sweden**

|                                 |                                                                                                                                                                                                                                                                                                                                                                                                                                                                                                                                                                                                                                                                                                                                                                                   |
|---------------------------------|-----------------------------------------------------------------------------------------------------------------------------------------------------------------------------------------------------------------------------------------------------------------------------------------------------------------------------------------------------------------------------------------------------------------------------------------------------------------------------------------------------------------------------------------------------------------------------------------------------------------------------------------------------------------------------------------------------------------------------------------------------------------------------------|
| Journal:                        | <i>BMJ Open</i>                                                                                                                                                                                                                                                                                                                                                                                                                                                                                                                                                                                                                                                                                                                                                                   |
| Manuscript ID:                  | bmjopen-2011-000778                                                                                                                                                                                                                                                                                                                                                                                                                                                                                                                                                                                                                                                                                                                                                               |
| Article Type:                   | Research                                                                                                                                                                                                                                                                                                                                                                                                                                                                                                                                                                                                                                                                                                                                                                          |
| Date Submitted by the Author:   | 07-Jan-2012                                                                                                                                                                                                                                                                                                                                                                                                                                                                                                                                                                                                                                                                                                                                                                       |
| Complete List of Authors:       | Björkenstam, Emma; Karolinska Institutet, Department of Public Health Sciences, Division of Social Medicine<br>Ljung, Rickard; Karolinska Institutet, Department of Public Health Sciences, Division of Social Medicine<br>Burström, Bo; Karolinska Institutet, Department of Public Health Sciences, Division of Social Medicine<br>Mittendorfer-Rutz, Ellenor; Karolinska Institutet, Department of Clinical Neuroscience, Division of Insurance Medicine<br>Hallqvist, Johan; Karolinska Institutet, Department of Public Health Sciences, Division of Public Health Epidemiology; Uppsala University, Department of Public Health and Caring Sciences<br>Ringbäck Weitoft, Gunilla; National Board of Health and Welfare, Department of Statistics, Monitoring and Evaluation |
| <b>Primary Subject Heading</b>: | Mental health                                                                                                                                                                                                                                                                                                                                                                                                                                                                                                                                                                                                                                                                                                                                                                     |
| Secondary Subject Heading:      | Epidemiology, Public health                                                                                                                                                                                                                                                                                                                                                                                                                                                                                                                                                                                                                                                                                                                                                       |
| Keywords:                       | EPIDEMIOLOGY, MENTAL HEALTH, SOCIAL MEDICINE                                                                                                                                                                                                                                                                                                                                                                                                                                                                                                                                                                                                                                                                                                                                      |
|                                 |                                                                                                                                                                                                                                                                                                                                                                                                                                                                                                                                                                                                                                                                                                                                                                                   |

SCHOLARONE™  
Manuscripts

1  
2  
3 **Quality of medical care and excess mortality in psychiatric patients**  
4 **– a nationwide register-based study in Sweden**  
5  
6

7 Emma Björkenstam BSc<sup>1,2</sup>, Rickard Ljung M.D., MPH, PhD<sup>1,2,3</sup>, Bo Burström M.D., PhD<sup>1</sup>,  
8 Ellenor Mittendorfer-Rutz PhD<sup>4</sup>, Johan Hallqvist M.D., PhD<sup>5,6</sup>, Gunilla Ringbäck Weitoft  
9  
10  
11  
12 PhD<sup>2</sup>  
13

14 <sup>1</sup> Department of Public Health Sciences, Division of Social Medicine, Karolinska Institutet,  
15 Stockholm, Sweden  
16

17 <sup>2</sup> Department of Statistics, Monitoring and Evaluation, National Board of Health and Welfare,  
18 Stockholm, Sweden  
19

20 <sup>3</sup> Upper Gastrointestinal Research, Department of Molecular Medicine and Surgery,  
21 Karolinska Institutet, Stockholm, Sweden  
22

23 <sup>4</sup> Department of Clinical Neuroscience, Division of Insurance Medicine, Karolinska Institutet,  
24 Stockholm, Sweden  
25

26 <sup>5</sup> Department of Public Health Sciences, Division of Public Health Epidemiology, Karolinska  
27 Institutet, Stockholm, Sweden  
28

29 <sup>6</sup> Department of Public Health and Caring Sciences, Uppsala University, Uppsala, Sweden  
30  
31

32  
33  
34  
35 Corresponding author: Emma Björkenstam

36 National Board of Health and Welfare, SE-106 30 Stockholm, Sweden

37 Telephone: +46 75 247 31 93, fax: +46 75 247 32 52

38 E-mail: [emma.bjorkenstam@socialstyrelsen.se](mailto:emma.bjorkenstam@socialstyrelsen.se)  
39  
40

41  
42  
43 **Key words:** quality of health care, mental disorders/mortality, cohort studies, hospitalization,  
44 cause of death  
45  
46

47  
48 Word count: 2 847  
49  
50  
51  
52  
53  
54  
55  
56  
57  
58  
59  
60

## ARTICLE SUMMARY

### Article focus:

- To investigate whether psychiatric patients have higher overall and cause-specific mortality
- To study whether the quality of somatic care for psychiatric patients is different from the care provided to patients with no concurrent mental disorder.

### Key messages:

- This study shows a marked increase in excess mortality in mentally ill men and women.
- The findings suggest a lower quality of health care in the treatment of somatic disorders in psychiatric patients regarding the indicators studied.
- Careful medical examination of psychiatric patients together with efforts to promote a healthier life style may be of great importance in order to prevent, detect, and treat somatic disease.

### Strengths and limitations:

- The strengths of the study include the population-based design, using national registers with high completeness
- We were unable to study the effects of health-related behaviors such as excessive alcohol consumption or tobacco smoking, which is a limitation.

## ABSTRACT

**Objective:** To assess overall and cause-specific mortality, and the quality of somatic care among psychiatric patients.

**Design:** A register-based cohort study

**Setting:** All individuals aged 20-79 in Sweden in 2005.

**Participants:** In total 6 294 339 individuals.

**Primary outcome measure:** The individuals were followed for mortality in 2006 and 2007, generating 72 187 deaths. Psychiatric patients were grouped according to their diagnosis in the National Patient Register. Mortality risk of psychiatric patients was compared to that of non-psychiatric patients. Estimates of relative risk of mortality were calculated as incidence rate ratios (IRRs) with 95% confidence intervals (CIs) using Poisson regression analysis. Psychiatric patients were compared with non-psychiatric patients for three health care quality indicators: the proportion of avoidable hospitalisations, case fatality rate after myocardial infarction, and statin use among diabetic patients.

**Results:** Compared to individuals with no episodes of treatment for mental disorder, psychiatric patients had a substantially increased risk of all studied death-causes as well as death from conditions considered amenable to intervention by the health service, i.e. avoidable mortality. The highest mortality was found among those with another mental disorder, predominantly substance abuse (for women, an IRR of 4.7 (95% CI 4.3 to 5.0), and for men an IRR of 4.8 (95% CI 4.6 to 5.0)).

The analysis of quality of somatic care revealed lower levels of health care quality for psychiatric patients, signalling failures in public health and medical care.

**Conclusion:** This study shows a marked increase in excess mortality, suggesting a lower quality of somatic health care in psychiatric patients.

## INTRODUCTION

Psychiatric patients have been reported to have higher mortality rates and shorter life expectancy compared to the general population.<sup>1-6</sup> This applies especially to patients with severe psychiatric diseases, such as schizophrenia<sup>7-10</sup> and bipolar disorder.<sup>11,12</sup> The highest risks have been found among patients with substance abuse.<sup>3,5,13,14</sup>

Psychiatric patients have a particularly pronounced risk of suicide.<sup>15-18</sup> Cardiovascular disease is also a major cause of excess deaths, partly due to a higher prevalence of smoking, obesity and hypertension.<sup>19-21</sup> There are conflicting data on cancer incidence and mortality in psychiatric patients, although most studies suggest that while cancer mortality is higher, incidence is no different from that of the general population.<sup>22,23</sup> Other potential explanations for the excess mortality are differences in access, provision and quality of somatic health care.<sup>24</sup> For instance, it has been shown that people with a diagnosis of a mental disorder have less access to primary health care.<sup>25</sup> Lower quality of diabetes care<sup>26</sup> and cardiovascular procedures<sup>19,27</sup> have also been documented. In Sweden, different indicators are often used as measures reflecting health care quality.<sup>28</sup>

The concept of avoidable mortality was introduced in 1976 as an indicator of quality of health care.<sup>29</sup> Avoidable mortality measures deaths that could be argued to have been avoidable either by the health care system or by public health interventions, and has been applied in comparisons between regions, populations and over time. Psychiatric patients have been shown to have higher avoidable mortality rates than the general population,<sup>13,30</sup> and questions have been raised as to whether the medical care of physical disorders provided to psychiatric patients is less adequate than for the population in general.<sup>31</sup>

The aim of this study was to investigate whether psychiatric patients have higher overall and cause-specific mortality, and whether the quality of somatic care for psychiatric patients is different from the care provided to patients with no concurrent mental disorder.

1  
2  
3  
4  
5  
6  
7  
8  
9  
10  
11  
12  
13  
14  
15  
16  
17  
18  
19  
20  
21  
22  
23  
24  
25  
26  
27  
28  
29  
30  
31  
32  
33  
34  
35  
36  
37  
38  
39  
40  
41  
42  
43  
44  
45  
46  
47  
48  
49  
50  
51  
52  
53  
54  
55  
56  
57  
58  
59  
60

Results are reported with regard to age, sex, mental disorder, and comorbid substance abuse disorders.

For peer review only

## METHOD

### Study population

The study population comprised individuals alive and registered in Sweden in 2004 and 2005, aged 20-79 i.e. those born between 1926 and 1985. After excluding individuals diagnosed with mental retardation (as defined by the International Classification of Diseases, tenth revision (ICD-10): F70-F79) the study population comprised 6 294 339 individuals. The cohort was followed from January 1, 2006 until December 31, 2007. We used the unique personal identity number assigned to each Swedish citizen or permanent resident to link information from four population-based registers.<sup>32</sup>

### Types of mental disorder

We identified all individuals recorded with a principal psychiatric diagnostic code as defined by the ICD-10 F04-F99 (i.e. dementia excluded, besides mental retardation) in inpatient care or specialised outpatient care in 2004 or 2005 in the National Patient Register. The National Patient Register covers all inpatient care in Sweden since 1987 (psychiatric inpatient care since 1973) and all specialised outpatient care since 2001. If a patient had more than one discharge or outpatient visit, the principal diagnoses from all discharges and outpatient visits were kept to further categorise patients. Five mutually exclusive exposure groups were created according to a hierarchy of diagnoses: *i*) schizophrenia and other non-affective psychoses (diagnosis codes F20-F29), *ii*) affective disorder (F30-F39), *iii*) anxiety disorder (F40-F48), *iv*) other psychiatric diagnoses, (F04-F99 except for diagnoses above), *v*) persons without inpatient and outpatient care due to mental disorder served as the reference group.

Psychiatric in- or outpatient care due to substance abuse disorder was also studied in a sub-analysis and was divided into categories according to whether the substance abuse was attributed to alcohol (F10), narcotic-related drugs (F11-F19), or both.

1  
2  
3 As certain mental disorders, e.g. bipolar disorder and schizophrenia are highly comorbid with  
4 alcohol and other substance abuse,<sup>33</sup> schizophrenia/other non-affective psychoses, affective or  
5 anxiety disorder were analysed with and without a coexisting substance abuse disorder  
6 (attributed to either alcohol or narcotics-related drugs). In these analyses, persons without  
7 inpatient and outpatient care due to mental disorder served as the reference group.  
8  
9

### 14 **Causes of death**

16 The underlying cause of death, coded according to the ICD-10, was obtained from the Causes  
17 of Death Register. This register contains information on all deceased Swedish residents since  
18 1952 and has a very high coverage. Since 1997 all deceased have been included, though for  
19 0.5% there is a lack of medical information.  
20  
21

22 Causes of death were grouped as follows: ischemic heart disease (IHD) (diagnosis codes I20-  
23 I25), cancer (C00-C97), suicide and death with undetermined intent (X60-X84 and Y10-Y34),  
24 and external causes of death (suicide excluded) (V01-Y89 (except for X60-X84, Y10-Y34)).  
25

26 The indicators of avoidable mortality were divided into causes of death reflecting the outcome  
27 of medical care, and causes reflecting the effect of the national health policy. The following  
28 diseases were included as medical care indicators: typhoid (A01.0), tetanus (A35),  
29 tuberculosis (A15-A19 and B90), malignant neoplasm of cervix uteri (C53), Hodgkin's  
30 disease (C81), diabetes (E10-E14), chronic rheumatic heart disease (I05-I09), hypertensive  
31 disease (I10-I15), stroke (I60-I69), asthma (J45-J46), appendicitis (K35-K38), abdominal  
32 hernia (K40-K45), cholelithiasis and cholecystitis (K80-K81 and K83.0), maternal deaths  
33 (O00-O99), and osteomyelitis (M86-M87). Malignant neoplasms of the oesophagus (C15),  
34 malignant neoplasms of the trachea, bronchus or lung (C34), cirrhosis of the liver (K70 and  
35 K73-K74), and motor vehicle accidents (V00-V99) were included as national health policy  
36 indicators.  
37  
38  
39  
40  
41  
42  
43  
44  
45  
46  
47  
48  
49  
50  
51  
52  
53  
54

### 56 **Health care quality indicators**



1  
2  
3 In analyses of indicators presumably reflecting aspects of health care quality, the age-span  
4 was restricted to individuals aged 40-79, because the studied outcomes are rare in younger  
5 individuals. The indicator regarding avoidable hospitalisation is based on the assumption that  
6 unnecessary hospitalisation can be avoided if patients with selected conditions receive proper  
7 outpatient care. This indicator includes hospitalisations for some chronic conditions (anaemia,  
8 asthma, diabetic complications, heart failure, hypertension, chronic obstructive lung disease,  
9 and angina pectoris), and hospitalisations for some acute conditions (bleeding ulcers,  
10 diarrhoea, epileptic seizures, inflammatory diseases of the female pelvic organs, pyelitis, and  
11 ear, nose and throat infection). The indicator regarding 28-day case fatality rate after  
12 myocardial infarction is an internationally established indicator of how well the health care  
13 system handles acute care after myocardial infarction. As a third indicator, the proportion on  
14 treatment with lipid lowering drugs was measured among patients receiving diabetes drugs.  
15 This treatment ought to be especially important for diabetes patients, due to the many risk  
16 factors in this population. All three indicators have been described elsewhere.<sup>28</sup>  
17  
18  
19  
20  
21  
22  
23  
24  
25  
26  
27  
28  
29  
30  
31  
32  
33

### 34 **Statistical analysis**

35  
36 Poisson regression analyses, adjusted for age, were used to evaluate the association between  
37 mental disorder, mortality, and indicators of quality of health care. As a measure of the  
38 relative occurrence of death we used the incidence rate ratio (IRR). We assessed person-years  
39 at risk by adding up the years the individuals were alive and living in Sweden during the  
40 follow-up period. SAS Genmod procedure was used to calculate IRRs with 95% confidence  
41 intervals (CI). SAS Enterprise Guide 4.2 (SAS Institute Inc. Cary, NC, USA) was used. Age-  
42 standardised percentages were calculated when analysing differences regarding health care  
43 quality.  
44  
45  
46  
47  
48  
49  
50  
51  
52  
53  
54  
55  
56  
57  
58  
59  
60

## RESULTS

Cohort characteristics for the 6 294 339 individuals, (3 141 454 women and 3 152 885 men) are presented in table 1. In total, 101 500 women and 90 946 men were treated for mental disorder in 2004 or 2005. About 11% of mentally ill women had a diagnosis of schizophrenia and other non-affective psychoses, 37% affective disorders, 32% anxiety disorder, and 20% other psychiatric diagnoses, and for men 13%, 26%, 23%, and 37% respectively. Almost three quarters of the men (73%) included in the group for other mental disorders were treated for substance abuse.

Among all psychiatric patients, 5 498 (2.9% in all, 2% in women, and 4% in men respectively) died during the follow-up period, compared to 66 689 (1.1% in all, 0.9% in women, and 1.3% in men) among persons without episodes of treatment for mental disorder.

The IRRs for different causes of death and by mental disorder for both sexes are shown in table 2. When compared to the general population, mortality was considerably higher among all categories of mental disorder and for all causes of death. The highest excess mortality was found among individuals in the category comprised of having another mental disorder, predominantly substance abuse, (for women, an IRR of 4.7 (95 % CI 4.3 to 5.0), and for men an IRR of 4.8 (95% CI 4.6 to 5.0)).

The IRRs for different causes of death presented in table 3 show that, regardless of mental disorder, those with comorbid substance abuse disorders had the highest mortality risk.

Women treated for both alcohol-related and drug-related substance abuse had the highest risk for premature death, except for cancer and avoidable mortality (table 4). Except for cancer, men treated for both alcohol-related and drug-related substance abuse had the highest risk for premature death in all studied causes of death.

1  
2  
3 Separate analyses of different age groups 20-44, 45-64, and 65-79, showed that the younger  
4 the patient, the more pronounced increased risk for premature death (data not shown). This  
5 was true for all categories of mental disorder and for all studied causes of death, except for  
6 suicide.  
7  
8  
9

10  
11 The majority of patients (78% of women and 77% of men) with affective and anxiety  
12 disorders had been treated in outpatient care only. For the other disorders, around half of the  
13 patients had been treated in outpatient care only. Mortality rates were higher among those  
14 hospitalised than those treated in outpatient care. This was true for all categories of mental  
15 disorders and for all causes of death (data not shown).  
16  
17  
18  
19  
20  
21

22  
23 The different health care quality indicators are presented in table 5. The percentage of  
24 avoidable admissions was higher among people treated for mental disorder, for women  
25 spanning from 2.4% to 4.1% (compared to 1.1% for those without episodes of treatment for  
26 mental disorder), and for men spanning from 3.4% to 5.4% (compared to 1.6%). Psychiatric  
27 patients had a higher 28-day case fatality rate for myocardial infarction, especially those  
28 treated for schizophrenia and other non-affective psychoses (women 53.5% (42.0-65.0) and  
29 men 51.4% (40.4-62.3)), compared to 26.5% of women (25.7-27.3) and 28.1% (27.5-28.6) of  
30 men not treated for mental disorder. The indicator on lipid lowering drug therapy shows that  
31 psychiatric patients with diabetes were given lipid lowering drugs to a lesser extent than  
32 diabetic patients without a concurrent mental disorder; this was particularly evident among  
33 both women and men with schizophrenia and other non-affective psychoses.  
34  
35  
36  
37  
38  
39  
40  
41  
42  
43  
44  
45  
46  
47  
48  
49  
50  
51  
52  
53  
54  
55  
56  
57  
58  
59  
60

## DISCUSSION

Our study of more than 6 million women and men shows that psychiatric patients had a substantially increased risk of death compared to individuals with no episodes of treatment for mental disorder, regardless of cause of death. Overall, people with schizophrenia and other non-affective psychoses, and people treated for substance abuse disorder had the highest risk for premature death. Psychiatric patients also had higher rates of potentially avoidable hospitalisations, higher case fatality rate after myocardial infarction, and lower use of lipid lowering therapy in diabetes.

The strengths of the study include the population-based design, using national registers with high completeness. The validity in the Causes of Death Register is very high, where information of cause of death is lacking in only 0.5% of the deceased.<sup>34</sup> The National Patient Register has close to complete coverage of all inpatient care. However in 2005 around 40% of psychiatric outpatient visits were not included, hence some patients who were treated in outpatient care are classified as unexposed, as there is no record of their outpatient visit. We were unable to study the effects of health-related behaviours such as excessive alcohol consumption or tobacco smoking, which is a limitation.

We found that psychiatric patients were at higher risk of premature death from IHD, particularly among those treated for schizophrenia and other non-affective psychoses. This has previously been shown in other settings,<sup>10,11,19,20</sup> and recently a study showed that the excess cardiovascular mortality among schizophrenia patients has increased over the past 25 years.<sup>7</sup> We also found an elevated risk for cancer mortality, although to a lesser extent, in particular in patients treated for schizophrenia and other non-affective psychoses and substance abuse disorders. Studies evaluating cancer incidence and mortality at the same time have shown that, while individuals with mental disorder did not show any increased incidence rate for many types of cancer, they did have higher cancer mortality, which might be

1  
2  
3 explained by delays in detection,<sup>23,35</sup> disparities in screening for cancer,<sup>22</sup> and treatment  
4 compliance.<sup>36</sup>  
5

6  
7 Psychiatric patients had an elevated risk of premature death from conditions considered  
8 amenable to intervention by the health service, i.e. avoidable mortality, compared to those not  
9 treated in psychiatric care. In particular, those treated for schizophrenia with comorbid  
10 substance abuse disorder had a higher risk, which has been shown by others.<sup>13,30</sup>  
11

12  
13 In line with previous studies, we found psychiatric patients to have significantly higher  
14 suicide risk, in particular those treated for schizophrenia and other non-affective psychosis,  
15 and affective disorder, and especially those treated with a comorbid substance abuse  
16 disorder.<sup>17</sup>  
17

18  
19 Mentally ill patients also had substantially increased risk of deaths from external causes when  
20 suicide was excluded. Studies have shown that people with mental illness are at greater risk of  
21 accidental and violent death, particularly when alcohol and drug comorbidities are involved.<sup>37</sup>  
22

23  
24 As mentioned earlier, our results showed that mentally ill individuals with a coexisting  
25 substance abuse disorder have significantly higher risk for premature death. When we  
26 excluded those with a coexisting substance abuse disorder, the increased mortality risk  
27 remained for all diagnosis groups except for schizophrenia and other non-affective psychosis,  
28 but with lower estimates (data not shown).  
29

30  
31 Consistent with previous research, substance abuse disorders strongly contributed to  
32 premature death among both female and male psychiatric patients, especially for those with  
33 both alcohol and drug abuse.  
34

35  
36 When studying a set of indicators aimed to reflect the outcome of health care quality, we  
37 found that patients with a mental disorder had higher rates of potentially avoidable  
38 hospitalisations. Under some circumstances hospitalization is necessary and well motivated,  
39 but for most studied diseases, it is a failure. A recent study on avoidable hospitalisation  
40  
41  
42  
43  
44  
45  
46  
47  
48  
49  
50  
51  
52  
53  
54  
55  
56  
57  
58  
59  
60

1  
2  
3 demonstrated that the quality of physical health care received by patients with schizophrenia  
4  
5 was poorer than that of the general population, signalling failures in public health and medical  
6  
7 care<sup>33</sup>.  
8

9  
10 The indicator of 28-day case fatality rate after myocardial infarction showed worse outcome  
11  
12 for those with a mental disorder. In a Danish study,<sup>19</sup> less somatic hospitalisation than needed,  
13  
14 and less use of invasive heart disease procedures among persons with severe mental disorder  
15  
16 than among the general population were suggested as additional reasons for their excess  
17  
18 mortality in IHD.  
19

20  
21 Another finding was the low percentage of lipid lowering drugs given to diabetic patients with  
22  
23 a concurrent mental disorder. As drug therapy against lipid disorders is particularly important  
24  
25 in diabetic patients,<sup>38</sup> this is a clear indication of inequality in health care.  
26

27  
28 Disparities in access to and utilisation of health care, as well as the quality of health care  
29  
30 provision may contribute to inequalities in health.<sup>39</sup> One reason for these disparities could be  
31  
32 that a person with mental disorder may not be able to effectively communicate and express  
33  
34 concerns because of cognitive disturbance. Also, psychiatrists and other mental health  
35  
36 providers may prioritise psychiatric issues and neglect physical problems.<sup>40</sup> There is also  
37  
38 some evidence of inequalities in case recognition and quality of medical care for psychiatric  
39  
40 patients, where general practitioners might minimise the clinical significance of physical  
41  
42 complaints when assessing and treating patients with a mental disorder; a process known as  
43  
44 diagnostic overshadowing.<sup>41</sup> As there is excess mortality across a wide range of mental  
45  
46 disorders, somatic care should be improved for all psychiatric patients, regardless of the  
47  
48 severity of the mental disorder.  
49  
50

51  
52 In addition to inequalities in utilisation and quality of health care, there are many factors that  
53  
54 contribute to poor physical health in people with a mental disorder, including health-related  
55  
56 behaviours and medication side-effects. The increased morbidity and mortality seen in this  
57  
58  
59  
60

1  
2  
3 population are largely due to a higher prevalence of modifiable risk factors, many of which  
4 are related to health-related behaviours. The use of alcohol and illicit drugs is more common  
5 among psychiatric patients. It is also known that psychiatric patients smoke to a larger  
6 extent,<sup>3,42</sup> which could be an explanation for the increased mortality in IHD and cancer.  
7  
8 Regardless of the kind of mental disorder, we found psychiatric patients to have an increased  
9 risk of dying in smoking-related cancer (data not shown). An unhealthy diet may also elevate  
10 the risk of various somatic diseases and thus increase the risk of death. The effects of these  
11 health-related behaviours have all been proposed as possible causative factors for excess  
12 mortality.<sup>43</sup> Also, medications used to treat severe mental disorder may increase the risk of  
13 diabetes and cardiovascular disease, as most mood stabilisers are associated with weight  
14 gain.<sup>12,44</sup> However, these factors make careful monitoring of the physical health status of  
15 patients with mental disorders even more important.

## 30 **Conclusion**

31 This study shows a marked increase in excess mortality in mentally ill men and women. This  
32 was especially evident in individuals with a comorbid substance abuse disorder. The findings  
33 also suggest a lower quality of health care in the treatment of somatic disorders in psychiatric  
34 patients. Careful medical examination of psychiatric patients together with efforts to promote  
35 a healthier life style may be of great importance in order to prevent, detect, and treat somatic  
36 disease.  
37  
38  
39  
40  
41  
42  
43  
44  
45  
46  
47

## 48 **ACKNOWLEDGEMENTS**

49 We thank Dr. Robert Bodén and Dr. Herman Holm for excellent advice.

## 52 **FUNDING**

53  
54  
55 Ellenor Mittendorfer Rutz is the recipient of the Assistant Professor grant from the Swedish  
56 Research Council.  
57  
58  
59  
60

## COMPETING INTERESTS

There are no competing interests.

## CONTRIBUTORSHIP STATEMENT

EB, GWR and RL originated the idea. EB analyzed the data and wrote the manuscript draft.

All authors contributed the interpretation of the results and to the writing of the final manuscript.

## DATA SHARING

There is no additional data available.

For peer review only



## References

1. D'Avanzo B, La Vecchia C, Negri E. Mortality in long-stay patients from psychiatric hospitals in Italy--results from the Qalyop Project. *Soc Psychiatry Psychiatr Epidemiol* 2003;38:385-9.
2. Grigoletti L, Perini G, Rossi A, *et al.* Mortality and cause of death among psychiatric patients: a 20-year case-register study in an area with a community-based system of care. *Psychol Med* 2009;39:1875-84.
3. Harris EC, Barraclough B. Excess mortality of mental disorder. *Br J Psychiatry* 1998;173:11-53.
4. Kisely S, Smith M, Lawrence D, *et al.* Mortality in individuals who have had psychiatric treatment: population-based study in Nova Scotia. *Br J Psychiatry* 2005;187:552-8.
5. Meloni D, Miccinesi G, Bencini A, *et al.* Mortality among discharged psychiatric patients in Florence, Italy. *Psychiatr Serv* 2006;57:1474-81.
6. Miller BJ, Paschall CB, 3rd, Svendsen DP. Mortality and medical comorbidity among patients with serious mental illness. *Psychiatr Serv* 2006;57:1482-7.
7. Brown S, Kim M, Mitchell C, *et al.* Twenty-five year mortality of a community cohort with schizophrenia. *Br J Psychiatry* 2010;196:116-21.
8. McGrath J, Saha S, Chant D, *et al.* Schizophrenia: a concise overview of incidence, prevalence, and mortality. *Epidemiol Rev* 2008;30:67-76.
9. Saha S, Chant D, McGrath J. A systematic review of mortality in schizophrenia: is the differential mortality gap worsening over time? *Arch Gen Psychiatry* 2007;64:1123-31.
10. Osby U, Correia N, Brandt L, *et al.* Mortality and causes of death in schizophrenia in Stockholm county, Sweden. *Schizophr Res* 2000;45:21-8.
11. Osby U, Brandt L, Correia N, *et al.* Excess mortality in bipolar and unipolar disorder in Sweden. *Arch Gen Psychiatry* 2001;58:844-50.
12. Roshanaei-Moghaddam B, Katon W. Premature mortality from general medical illnesses among persons with bipolar disorder: a review. *Psychiatr Serv* 2009;60:147-56.
13. Ringback Weitoft G, Gullberg A, Rosen M. Avoidable mortality among psychiatric patients. *Soc Psychiatry Psychiatr Epidemiol* 1998;33:430-7.
14. Rosen CS, Kuhn E, Greenbaum MA, *et al.* Substance abuse-related mortality among middle-aged male VA psychiatric patients. *Psychiatr Serv* 2008;59:290-6.
15. Carlborg A, Winnerback K, Jonsson EG, *et al.* Suicide in schizophrenia. *Expert Rev Neurother* 2010;10:1153-64.
16. Lester D. Sex differences in completed suicide by schizophrenic patients: a meta-analysis. *Suicide Life Threat Behav* 2006;36:50-6.
17. Limosin F, Loze JY, Philippe A, *et al.* Ten-year prospective follow-up study of the mortality by suicide in schizophrenic patients. *Schizophr Res* 2007;94:23-8.
18. Palmer BA, Pankratz VS, Bostwick JM. The lifetime risk of suicide in schizophrenia: a reexamination. *Arch Gen Psychiatry* 2005;62:247-53.
19. Laursen TM, Munk-Olsen T, Agerbo E, *et al.* Somatic hospital contacts, invasive cardiac procedures, and mortality from heart disease in patients with severe mental disorder. *Arch Gen Psychiatry* 2009;66:713-20.
20. Lawrence D, Kisely S, Pais J. The epidemiology of excess mortality in people with mental illness. *Can J Psychiatry* 2010;55:752-60.

- 1
- 2
- 3 21. Lawrence DM, Holman CD, Jablensky AV, *et al.* Death rate from ischaemic
- 4 heart disease in Western Australian psychiatric patients 1980-1998. *Br J*
- 5 *Psychiatry* 2003;182:31-6.
- 6 22. Howard LM, Barley EA, Davies E, *et al.* Cancer diagnosis in people with severe
- 7 mental illness: practical and ethical issues. *Lancet Oncol* 2010;11:797-804.
- 8 23. Kisely S, Sadek J, MacKenzie A, *et al.* Excess cancer mortality in psychiatric
- 9 patients. *Can J Psychiatry* 2008;53:753-61.
- 10 24. Druss BG, Bradford WD, Rosenheck RA, *et al.* Quality of medical care and
- 11 excess mortality in older patients with mental disorders. *Arch Gen Psychiatry*
- 12 2001;58:565-72.
- 13 25. Levinson Miller C, Druss BG, Dombrowski EA, *et al.* Barriers to primary
- 14 medical care among patients at a community mental health center. *Psychiatr*
- 15 *Serv* 2003;54:1158-60.
- 16 26. Frayne SM, Halanych JH, Miller DR, *et al.* Disparities in diabetes care: impact
- 17 of mental illness. *Archives of internal medicine* 2005;165:2631-8.
- 18 27. Druss BG. Cardiovascular procedures in patients with mental disorders. *JAMA*
- 19 2000;283:3198-9.
- 20 28. National Board of Health and Welfare, Swedish Association of Local
- 21 Authorities and Regions. Quality and Efficiency in Swedish Health Care.
- 22 Regional Comparisons 2010; 2011.
- 23 29. Rutstein D, Berenberg W, Chalmers T, *et al.* Measuring the quality of medical
- 24 care. *N Engl J Med* 1976;294:582-8.
- 25 30. Amaddeo F, Barbui C, Perini G, *et al.* Avoidable mortality of psychiatric
- 26 patients in an area with a community-based system of mental health care. *Acta*
- 27 *Psychiatr Scand* 2007;115:320-5.
- 28 31. Sokal J, Messias E, Dickerson FB, *et al.* Comorbidity of medical illnesses
- 29 among adults with serious mental illness who are receiving community
- 30 psychiatric services. *J Nerv Ment Dis* 2004;192:421-7.
- 31 32. Ludvigsson JF, Otterblad-Olausson P, Pettersson BU, *et al.* The Swedish
- 32 personal identity number: possibilities and pitfalls in healthcare and medical
- 33 research. *Eur J Epidemiol* 2009;24:659-67.
- 34 33. Thornicroft G. *Shunned: Discrimination against people with mental illness.* New
- 35 York, United States: Oxford University Press; 2006.
- 36 34. National Board of Health and Welfare. *Causes of Death 2010.* Stockholm,
- 37 Sweden; 2011.
- 38 35. Lawrence D, Holman CD, Jablensky AV, *et al.* Excess cancer mortality in
- 39 Western Australian psychiatric patients due to higher case fatality rates. *Acta*
- 40 *Psychiatr Scand* 2000;101:382-8.
- 41 36. Kunkel EJ, Woods CM, Rodgers C, *et al.* Consultations for 'maladaptive denial
- 42 of illness' in patients with cancer: psychiatric disorders that result in
- 43 noncompliance. *Psychooncology* 1997;6:139-49.
- 44 37. Gau SS, Cheng AT. Mental illness and accidental death. Case-control
- 45 psychological autopsy study. *Br J Psychiatry* 2004;185:422-8.
- 46 38. Colhoun HM, Betteridge DJ. Treatment of lipid disorders in patients with
- 47 diabetes. *Current treatment options in cardiovascular medicine* 2006;8:37-45.
- 48 39. Lawrence D, Kisely S. Inequalities in healthcare provision for people with
- 49 severe mental illness. *J Psychopharmacol* 2010;24:61-8.
- 50 40. Kopp M, Fleischhacker WW, Sturz K, *et al.* Poor health behaviour and reduced
- 51 quality of life of people treated with psychotropic drugs. *Hum Psychopharmacol*
- 52 2011;26:161-7.
- 53
- 54
- 55
- 56
- 57
- 58
- 59
- 60

- 1  
2  
3 41. Jones S, Howard L, Thornicroft G. 'Diagnostic overshadowing': worse physical  
4 health care for people with mental illness. *Acta Psychiatr Scand* 2008;118:169-  
5 71.  
6 42. Brown S, Birtwistle J, Roe L, *et al*. The unhealthy lifestyle of people with  
7 schizophrenia. *Psychol Med* 1999;29:697-701.  
8 43. Brown S, Inskip H, Barraclough B. Causes of the excess mortality of  
9 schizophrenia. *Br J Psychiatry* 2000;177:212-7.  
10 44. De Hert M, Correll CU, Bobes J, *et al*. Physical illness in patients with severe  
11 mental disorders. I. Prevalence, impact of medications and disparities in health  
12 care. *World Psychiatry* 2011;10:52-77.  
13  
14  
15  
16  
17  
18  
19  
20  
21  
22  
23  
24  
25  
26  
27  
28  
29  
30  
31  
32  
33  
34  
35  
36  
37  
38  
39  
40  
41  
42  
43  
44  
45  
46  
47  
48  
49  
50  
51  
52  
53  
54  
55  
56  
57  
58  
59  
60

For peer review only

Table 1. Cohort characteristics

|                                                              | Women                                           |                    |                  |                       |                    | Men                                             |                    |                  |                       |                    |  |
|--------------------------------------------------------------|-------------------------------------------------|--------------------|------------------|-----------------------|--------------------|-------------------------------------------------|--------------------|------------------|-----------------------|--------------------|--|
|                                                              | Schizophrenia and other non-affective psychoses | Affective disorder | Anxiety disorder | Other mental disorder | No mental disorder | Schizophrenia and other non-affective psychoses | Affective disorder | Anxiety disorder | Other mental disorder | No mental disorder |  |
| N                                                            | 11 165                                          | 37 245             | 32 690           | 20 400                | 3 039 954          | 11 993                                          | 23 762             | 21 209           | 33 982                | 3 061 939          |  |
| %                                                            | 0.2                                             | 0.6                | 0.5              | 0.3                   | 48.3               | 0.2                                             | 0.4                | 0.3              | 0.5                   | 48.6               |  |
| Mean age (SD)                                                | 50.1 (13.6)                                     | 46.1 (15.6)        | 42.4 (14.3)      | 43.8 (16.4)           | 48.1 (16.0)        | 45.8 (13.0)                                     | 46.9 (14.9)        | 42.0 (13.4)      | 47.2 (15.2)           | 47.2 (15.6)        |  |
| Person-years                                                 | 21 923                                          | 73 620             | 64 788           | 40 039                | 6 017 464          | 23 463                                          | 46 604             | 41 790           | 65 925                | 6 042 510          |  |
| <b>Causes of death</b>                                       |                                                 |                    |                  |                       |                    |                                                 |                    |                  |                       |                    |  |
| All-cause mortality                                          | 344 (3.1 %)                                     | 669 (1.8 %)        | 413 (1.3 %)      | 638 (3.1 %)           | 27 421 (0.9 %)     | 459 (3.8 %)                                     | 764 (3.2 %)        | 389 (1.8 %)      | 1 822 (5.4 %)         | 39 268 (1.3 %)     |  |
| Avoidable mortality: Medical Care Indicators                 | 34 (0.3 %)                                      | 68 (0.2 %)         | 36 (0.1 %)       | 54 (0.3 %)            | 3 125 (0.1 %)      | 30 (0.3 %)                                      | 78 (0.3 %)         | 28 (0.1 %)       | 140 (0.4 %)           | 3 904 (0.1 %)      |  |
| Avoidable mortality: National Health Policy Indicators       | 22 (0.2 %)                                      | 57 (0.2 %)         | 43 (0.1 %)       | 89 (0.4 %)            | 2 859 (0.1 %)      | 34 (0.3 %)                                      | 41 (0.2 %)         | 38 (0.2 %)       | 226 (0.7 %)           | 4 062 (0.1 %)      |  |
| Ischemic heart disease                                       | 42 (0.4 %)                                      | 68 (0.2 %)         | 47 (0.1 %)       | 72 (0.4 %)            | 3 279 (0.1 %)      | 79 (0.7 %)                                      | 117 (0.5 %)        | 68 (0.3 %)       | 280 (0.8 %)           | 7 878 (0.3 %)      |  |
| Cancer (all types)                                           | 83 (0.7 %)                                      | 163 (0.4 %)        | 129 (0.4 %)      | 111 (0.5 %)           | 12 369 (0.4 %)     | 65 (0.5 %)                                      | 136 (0.6 %)        | 71 (0.3 %)       | 247 (0.7 %)           | 13 636 (0.4 %)     |  |
| Suicide                                                      | 42 (0.4 %)                                      | 117 (0.3 %)        | 71 (0.2 %)       | 73 (0.4 %)            | 439 (0.0 %)        | 79 (0.7 %)                                      | 167 (0.7 %)        | 69 (0.3 %)       | 174 (0.5 %)           | 1 259 (0.0 %)      |  |
| Deaths from external causes (suicide excluded)               | 15 (0.1 %)                                      | 44 (0.1 %)         | 27 (0.1 %)       | 47 (0.2 %)            | 652 (0.0 %)        | 39 (0.3 %)                                      | 67 (0.3 %)         | 48 (0.2 %)       | 232 (0.7 %)           | 1 867 (0.1 %)      |  |
| <b>Health care quality indicators*</b>                       |                                                 |                    |                  |                       |                    |                                                 |                    |                  |                       |                    |  |
| Avoidable inpatient medical care                             | 8 413                                           | 22 833             | 17 078           | 11 171                | 1 961 968          | 7 864                                           | 15 502             | 11 126           | 22 762                | 1 931 860          |  |
| Number treated in 2006                                       | 234                                             | 521                | 409              | 445                   | 22 433             | 235                                             | 474                | 341              | 1 189                 | 29 159             |  |
| Myocardial infarction - 28-day case fatality                 |                                                 |                    |                  |                       |                    |                                                 |                    |                  |                       |                    |  |
| AMI in 2006 or 2007                                          | 77                                              | 164                | 134              | 118                   | 10 993             | 105                                             | 244                | 140              | 410                   | 23 786             |  |
| Dead within 28 days                                          | 36                                              | 62                 | 45               | 53                    | 3 108              | 50                                              | 88                 | 42               | 171                   | 6 467              |  |
| Lipid lowering drug therapy                                  |                                                 |                    |                  |                       |                    |                                                 |                    |                  |                       |                    |  |
| Number receiving diabetes drug therapy in 2006               | 722                                             | 1 200              | 726              | 596                   | 80 453             | 744                                             | 1 185              | 680              | 1 744                 | 116 270            |  |
| Of these, number who were given lipid lowering drugs in 2006 | 292                                             | 618                | 385              | 280                   | 45 193             | 318                                             | 631                | 367              | 743                   | 65 440             |  |

\* Individuals aged 40-79

**Table 2. Relative risk of death in psychiatric patients compared with a population with no episode of treatment for mental disorder (incidence rate ratios\* with 95% confidence intervals)**

| Mental disorder group                                      | All-cause mortality | Ischemic heart disease | Cancer (all types) | Avoidable mortality: Medical Care Indicators | Avoidable mortality: National Health Policy Indicators | Suicide          | Death from external causes (suicide excluded) |
|------------------------------------------------------------|---------------------|------------------------|--------------------|----------------------------------------------|--------------------------------------------------------|------------------|-----------------------------------------------|
| <b>Females</b>                                             |                     |                        |                    |                                              |                                                        |                  |                                               |
| No mental disorder                                         | 1 (REF)             | 1 (REF)                | 1 (REF)            | 1 (REF)                                      | 1 (REF)                                                | 1 (REF)          | 1 (REF)                                       |
| Schizophrenia and other non-affective psychoses            | 3.8 (3.4-4.2)       | 4.1 (3.1-5.6)          | 1.9 (1.5-2.4)      | 3.5 (2.5-4.9)                                | 2.1 (1.4-3.2)                                          | 24.9 (18.1-34.2) | 6.7 (4.0-11.1)                                |
| Affective disorder                                         | 2.4 (2.2-2.6)       | 2.1 (1.7-2.7)          | 1.3 (1.1-1.5)      | 2.2 (1.7-2.8)                                | 1.9 (1.5-2.5)                                          | 22.3 (18.1-27.3) | 6.1 (4.5-8.3)                                 |
| Anxiety disorder                                           | 2.6 (2.3-2.8)       | 2.9 (2.1-3.8)          | 1.7 (1.4-2.0)      | 2.2 (1.6-3.0)                                | 2.4 (1.8-3.2)                                          | 16.0 (12.5-20.6) | 5.3 (3.6-7.8)                                 |
| Other mental disorder (including substance abuse disorder) | 4.7 (4.3-5.0)       | 4.6 (3.6-5.8)          | 1.8 (1.5-2.2)      | 3.5 (2.7-4.6)                                | 6.2 (5.0-7.6)                                          | 26.7 (20.8-34.3) | 12.6 (9.4-17.0)                               |
| <b>Males</b>                                               |                     |                        |                    |                                              |                                                        |                  |                                               |
| No mental disorder                                         | 1 (REF)             | 1 (REF)                | 1 (REF)            | 1 (REF)                                      | 1 (REF)                                                | 1 (REF)          | 1 (REF)                                       |
| Schizophrenia and other non-affective psychoses            | 4.6 (4.2-5.0)       | 4.3 (3.4-5.3)          | 1.9 (1.5-2.5)      | 3.4 (2.4-4.9)                                | 3.0 (2.1-4.1)                                          | 16.1 (12.9-20.3) | 6.2 (4.5-8.6)                                 |
| Affective disorder                                         | 2.8 (2.7-3.1)       | 2.2 (1.9-2.7)          | 1.5 (1.2-1.7)      | 3.0 (2.4-3.8)                                | 1.4 (1.1-2.0)                                          | 17.2 (14.6-20.2) | 4.9 (3.8-6.2)                                 |
| Anxiety disorder                                           | 2.8 (2.5-3.0)       | 2.7 (2.1-3.5)          | 1.5 (1.2-2.0)      | 2.3 (1.6-3.4)                                | 2.3 (1.7-3.2)                                          | 8.3 (6.5-10.6)   | 4.5 (3.4-6.1)                                 |
| Other mental disorder (including substance abuse disorder) | 4.8 (4.6-5.0)       | 3.7 (3.3-4.2)          | 1.9 (1.6-2.1)      | 3.9 (3.3-4.6)                                | 5.5 (4.8-6.3)                                          | 12.6 (10.8-14.8) | 11.8 (10.3-13.6)                              |

\* Adjusted for age

Table 3. Associations of mental disorder and substance abuse in relation to mortality (incidence rate ratios\* with 95% confidence intervals)

| Mental disorder group                                                                   | N         | All-cause mortality | Ischemic heart disease | Cancer (all types) | Avoidable mortality: Medical Care Indicators | Avoidable mortality: National Health Policy Indicators | Suicide            | Death from |
|-----------------------------------------------------------------------------------------|-----------|---------------------|------------------------|--------------------|----------------------------------------------|--------------------------------------------------------|--------------------|------------|
| <b>Females</b>                                                                          |           |                     |                        |                    |                                              |                                                        |                    |            |
| No mental disorder                                                                      | 3 039 954 | 1 (REF)             | 1 (REF)                | 1 (REF)            | 1 (REF)                                      | 1 (REF)                                                | 1 (REF)            |            |
| Schizophrenia and other non-affective psychoses <b>with</b> substance abuse disorder    | 502       | 10.8 (7.1-16.6)     | 5.7 (0.8-40.4)         | 5.2 (2.2-12.6)     | -                                            | 21.5 (8.9-51.8)                                        | 44.6 (14.3-138.8)  |            |
| Schizophrenia and other non-affective psychoses <b>without</b> substance abuse disorder | 10 663    | 3.6 (3.2-4.0)       | 4.1 (3.0-5.6)          | 1.8 (1.5-2.3)      | 3.5 (2.5-5.0)                                | 1.7 (1.0-2.7)                                          | 24.2 (17.4-33.6)   |            |
| Affective disorder <b>with</b> substance abuse disorder                                 | 1 919     | 6.4 (4.9-8.3)       | 3.5 (1.1-10.9)         | 2.7 (1.5-4.8)      | 3.4 (1.1-10.6)                               | 6.5 (3.1-13.6)                                         | 61.1 (37.1-100.6)  |            |
| Affective disorder <b>without</b> substance abuse disorder                              | 35 326    | 2.3 (2.1-2.5)       | 2.1 (1.6-2.7)          | 1.2 (1.1-1.4)      | 2.2 (1.7-2.8)                                | 1.8 (1.3-2.3)                                          | 20.3 (16.3-25.2)   |            |
| Anxiety disorder <b>with</b> substance abuse disorder                                   | 1 551     | 7.3 (5.4-9.8)       | 10.9 (4.9-24.3)        | 2.0 (0.9-4.4)      | 1.7 (0.2-12.2)                               | 6.8 (2.8-16.4)                                         | 63.1 (36.3-109.7)  |            |
| Anxiety disorder <b>without</b> substance abuse disorder                                | 31 139    | 2.4 (2.2-2.7)       | 2.6 (1.9-3.5)          | 1.7 (1.4-2.0)      | 2.2 (1.6-3.0)                                | 2.2 (1.6-3.0)                                          | 13.8 (10.5-18.2)   |            |
| Other mental disorder <b>with</b> substance abuse disorder                              | 387       | 17.0 (10.4-27.7)    | -                      | -                  | 11.3 (1.6-80.4)                              | -                                                      | 171.6 (85.1-346.0) |            |
| Other mental disorder <b>without</b> substance abuse disorder                           | 10 773    | 2.6 (2.3-3.0)       | 2.9 (2.0-4.1)          | 1.4 (1.1-1.8)      | 2.6 (1.8-3.8)                                | 0.9 (0.4-1.8)                                          | 10.0 (5.9-17.0)    |            |
| Substance abuse disorder without a psychiatric diagnosis                                | 9 240     | 7.9 (7.1-8.7)       | 8.4 (6.2-11.4)         | 2.4 (1.9-3.1)      | 5.3 (3.6-7.8)                                | 13.4 (10.7-16.7)                                       | 39.8 (29.8-53.2)   |            |
| <b>Males</b>                                                                            |           |                     |                        |                    |                                              |                                                        |                    |            |
| No mental disorder                                                                      | 3 061 939 | 1 (REF)             | 1 (REF)                | 1 (REF)            | 1 (REF)                                      | 1 (REF)                                                | 1 (REF)            |            |
| Schizophrenia and other non-affective psychoses <b>with</b> substance abuse disorder    | 1 088     | 12.5 (9.8-15.9)     | 4.9 (1.9-13.2)         | 3.8 (1.7-8.4)      | 5.3 (1.3-21.1)                               | 11 (5.2-23.1)                                          | 41.3 (25.6-66.7)   |            |
| Schizophrenia and other non-affective psychoses <b>without</b> substance abuse disorder | 10 905    | 4.2 (3.8-4.6)       | 4.3 (3.4-5.3)          | 1.8 (1.4-2.4)      | 3.4 (2.3-4.9)                                | 2.5 (1.7-3.6)                                          | 13.9 (10.7-17.9)   |            |
| Affective disorder <b>with</b> substance abuse disorder                                 | 2 237     | 6.7 (5.6-8.1)       | 5.4 (3.4-8.6)          | 1.6 (0.9-3.0)      | 5.8 (3.0-11.2)                               | 5.3 (2.9-9.5)                                          | 43.7 (31.8-60.2)   |            |
| Affective disorder <b>without</b> substance abuse disorder                              | 21 525    | 2.6 (2.4-2.8)       | 2.0 (1.6-2.4)          | 1.5 (1.2-1.7)      | 2.8 (2.2-3.6)                                | 1.1 (0.8-1.6)                                          | 14.5 (12.1-17.4)   |            |
| Anxiety disorder <b>with</b> substance abuse disorder                                   | 1 900     | 9.7 (7.9-11.8)      | 7.7 (4.5-13.2)         | 2.5 (1.2-4.9)      | 2.5 (0.6-10.2)                               | 8.9 (4.9-16.1)                                         | 27.7 (17.8-43.1)   |            |
| Anxiety disorder <b>without</b> substance abuse disorder                                | 19 309    | 2.2 (2.0-2.5)       | 2.4 (1.8-3.1)          | 1.5 (1.2-1.9)      | 2.3 (1.6-3.4)                                | 1.8 (1.2-2.6)                                          | 6.5 (4.9-8.6)      |            |
| Other mental disorder <b>with</b> substance abuse disorder                              | 380       | 9.8 (6.7-14.4)      | 21.0 (11.3-39.0)       | 2.3 (0.6-9.1)      | 8.7 (2.2-35.0)                               | -                                                      | 47.6 (22.6-100.1)  |            |
| Other mental disorder <b>without</b> substance abuse disorder                           | 9 298     | 2.5 (2.2-2.8)       | 1.7 (1.3-2.2)          | 1.4 (1.1-1.8)      | 3.5 (2.7-4.7)                                | 1.2 (0.7-2.0)                                          | 5.4 (3.5-8.4)      |            |
| Substance abuse disorder without a psychiatric diagnosis                                | 24 304    | 6.1 (5.8-6.4)       | 4.8 (4.2-5.5)          | 2.1 (1.8-2.4)      | 4.0 (3.3-5.0)                                | 7.7 (6.7-8.8)                                          | 14.8 (12.5-17.6)   |            |

\* Adjusted for age

**Table 4. Relative risk of mortality in psychiatric patients with substance abuse disorder (IRR with 95% confidence intervals)**

|                                                       | N         | All-cause mortality | Ischemic heart disease | Cancer (all types) | Avoidable mortality: Medical Care Indicators | Avoidable mortality: National Health Policy Indicators | Suicide           | Death from external causes (suicide excluded) |
|-------------------------------------------------------|-----------|---------------------|------------------------|--------------------|----------------------------------------------|--------------------------------------------------------|-------------------|-----------------------------------------------|
| <b>Females</b>                                        |           |                     |                        |                    |                                              |                                                        |                   |                                               |
| No substance abuse disorder                           | 3 127 855 | 1 (REF)             | 1 (REF)                | 1 (REF)            | 1 (REF)                                      | 1 (REF)                                                | 1 (REF)           | 1 (REF)                                       |
| Substance abuse disorder, alcohol                     | 8 185     | 7.7 (6.9-8.5)       | 4.1 (0.6-29.3)         | 2.3 (1.8-3.0)      | 4.8 (3.2-7.2)                                | 13.8 (11.1-17.2)                                       | 29.5 (22.1-39.4)  | 22.6 (16.0-32.0)                              |
| Substance abuse disorder, drug abuse                  | 4 589     | 6.6 (5.5-8.0)       | 4.7 (2.3-9.4)          | 2.7 (1.8-4.1)      | 3.9 (1.9-8.2)                                | 6.1 (3.5-10.8)                                         | 36.9 (25.8-52.8)  | 22.9 (13.9-37.6)                              |
| Substance abuse disorder, both alcohol and drug abuse | 825       | 11.2 (8.0-15.7)     | 8.7 (6.4-11.8)         | 2.6 (1.0-6.9)      | 3.7 (0.5-26.5)                               | 7.8 (2.5-24.1)                                         | 54.4 (28.1-105.1) | 65.8 (32.7-132.4)                             |
| <b>Males</b>                                          |           |                     |                        |                    |                                              |                                                        |                   |                                               |
| No substance abuse disorder                           | 3 122 976 | 1 (REF)             | 1 (REF)                | 1 (REF)            | 1 (REF)                                      | 1 (REF)                                                | 1 (REF)           | 1 (REF)                                       |
| Substance abuse disorder, alcohol                     | 20 429    | 5.5 (5.3-5.9)       | 4.8 (4.2-5.5)          | 2.0(1.7-2.4)       | 3.8 (3.1-4.7)                                | 7.5 (6.6-8.7)                                          | 12.5 (10.4-14.9)  | 12.8 (10.8-15.0)                              |
| Substance abuse disorder, drug abuse                  | 7 753     | 9.4 (8.4-10.6)      | 5.8 (3.9-8.7)          | 2.7 (1.7-4.1)      | 4.9 (2.6-9.1)                                | 4.1 (2.4-7.0)                                          | 22.4 (17.7-28.4)  | 22.5 (18.0-28.3)                              |
| Substance abuse disorder, both alcohol and drug abuse | 1 727     | 14.5 (12.2-17.2)    | 6.8 (3.7-12.7)         | 2.5 (1.2-5.2)      | 8.7 (3.9-19.4)                               | 16.0 (10.0-25.4)                                       | 35.2 (24.2-51.2)  | 29.3 (19.6-43.9)                              |

\* Adjusted for age

1  
2  
3  
4  
5  
6  
7  
8  
9  
10  
11  
12  
13  
14  
15  
16  
17  
18  
19  
20  
21  
22  
23  
24  
25  
26  
27  
28  
29  
30  
31  
32  
33  
34  
35  
36  
37  
38  
39  
40  
41  
42  
43  
44  
45  
46  
47  
48  
49

**Table 5. Age-standardised percentage (with 95% confidence intervals) as measures of health care quality indicators for individuals aged 40-79, 2006**

| Mental disorder group                                      | N         | Avoidable inpatient medical care<br>% (95% CI) | Myocardial infarction - 28-day case fatality<br>% (95% CI) | Lipid lowering drug therapy<br>% (95% CI) |
|------------------------------------------------------------|-----------|------------------------------------------------|------------------------------------------------------------|-------------------------------------------|
| <b>Females</b>                                             |           |                                                |                                                            |                                           |
| No mental disorder                                         | 1 961 968 | 1.1 (1.1-1.1)                                  | 26.5 (25.7-27.3)                                           | 56.1 (55.7-56.4)                          |
| Schizophrenia and other non-affective psychoses            | 8 413     | 2.9 (2.6-3.3)                                  | 53.5 (42.0-65.0)                                           | 40.9 (36.8-45.1)                          |
| Affective disorder                                         | 22 833    | 2.4 (2.2-2.6)                                  | 34.8 (26.5-43.2)                                           | 51.9 (49.0-54.8)                          |
| Anxiety disorder                                           | 17 078    | 3.0 (2.7-3.3)                                  | 36.1 (28.8-43.4)                                           | 54.9 (50.9-58.8)                          |
| Other mental disorder (including substance abuse disorder) | 11 171    | 4.1 (3.7-4.5)                                  | 45.0 (35.8-54.3)                                           | 49.0 (44.8-53.1)                          |
| <b>Males</b>                                               |           |                                                |                                                            |                                           |
| No mental disorder                                         | 1 931 860 | 1.6 (1.5-1.6)                                  | 28.1 (27.5-28.6)                                           | 56.2 (55.9-56.5)                          |
| Schizophrenia and other non-affective psychoses            | 7 864     | 3.8 (3.3-4.4)                                  | 51.4 (40.4-62.3)                                           | 41.9 (37.2-46.5)                          |
| Affective disorder                                         | 15 502    | 3.4 (3.1-3.7)                                  | 39.2 (32.6-45.7)                                           | 53.8 (50.8-56.8)                          |
| Anxiety disorder                                           | 11 126    | 4.4 (3.9-4.9)                                  | 32.5 (23.1-42.0)                                           | 56.4 (51.9-60.8)                          |
| Other mental disorder (including substance abuse disorder) | 22 762    | 5.4 (5.1-5.7)                                  | 43.9 (38.6-49.1)                                           | 44.2 (41.7-46.7)                          |

For Peer review only



bmjopen-2011-000778 - Quality of medical care and excess mortality in  
 psychiatric patients - a nationwide register-based study in Sweden  
 STROBE Statement—Checklist of items that should be included in reports of *cohort studies*

|                              | Item No | Recommendation                                                                                                                                                                                            |
|------------------------------|---------|-----------------------------------------------------------------------------------------------------------------------------------------------------------------------------------------------------------|
| <b>Title and abstract</b>    | 1       | (a) Indicate the study's design with a commonly used term in the title or the abstract<br><b>Page 1</b>                                                                                                   |
|                              |         | (b) Provide in the abstract an informative and balanced summary of what was done and what was found<br><b>Page 3</b>                                                                                      |
| <b>Introduction</b>          |         |                                                                                                                                                                                                           |
| Background/rationale         | 2       | Explain the scientific background and rationale for the investigation being reported<br><b>Page 4</b>                                                                                                     |
| Objectives                   | 3       | State specific objectives, including any prespecified hypotheses<br><b>Page 5</b>                                                                                                                         |
| <b>Methods</b>               |         |                                                                                                                                                                                                           |
| Study design                 | 4       | Present key elements of study design early in the paper<br><b>Page 6</b>                                                                                                                                  |
| Setting                      | 5       | Describe the setting, locations, and relevant dates, including periods of recruitment, exposure, follow-up, and data collection<br><b>Page 6</b>                                                          |
| Participants                 | 6       | (a) Give the eligibility criteria, and the sources and methods of selection of participants. Describe methods of follow-up<br><b>Page 6</b>                                                               |
|                              |         | (b) For matched studies, give matching criteria and number of exposed and unexposed<br>N/A                                                                                                                |
| Variables                    | 7       | Clearly define all outcomes, exposures, predictors, potential confounders, and effect modifiers. Give diagnostic criteria, if applicable<br><b>Page 6 - 8</b>                                             |
| Data sources/<br>measurement | 8*      | For each variable of interest, give sources of data and details of methods of assessment (measurement). Describe comparability of assessment methods if there is more than one group<br><b>Page 6 - 8</b> |
| Bias                         | 9       | Describe any efforts to address potential sources of bias<br>N/A                                                                                                                                          |
| Study size                   | 10      | Explain how the study size was arrived at<br><b>Page 6</b>                                                                                                                                                |
| Quantitative variables       | 11      | Explain how quantitative variables were handled in the analyses. If applicable, describe which groupings were chosen and why<br>N/A                                                                       |
| Statistical methods          | 12      | (a) Describe all statistical methods, including those used to control for confounding<br><b>Page 8 - 9</b>                                                                                                |
|                              |         | (b) Describe any methods used to examine subgroups and interactions<br>N/A                                                                                                                                |
|                              |         | (c) Explain how missing data were addressed<br>N/A                                                                                                                                                        |
|                              |         | (d) If applicable, explain how loss to follow-up was addressed<br>N/A                                                                                                                                     |

(e) Describe any sensitivity analyses

| <b>Results</b>           |     |                                                                                                                                                                                                                                                  |
|--------------------------|-----|--------------------------------------------------------------------------------------------------------------------------------------------------------------------------------------------------------------------------------------------------|
| Participants             | 13* | (a) Report numbers of individuals at each stage of study—eg numbers potentially eligible, examined for eligibility, confirmed eligible, included in the study, completing follow-up, and analysed<br><b>Page 10 and page 20</b>                  |
|                          |     | (b) Give reasons for non-participation at each stage<br>N/A                                                                                                                                                                                      |
|                          |     | (c) Consider use of a flow diagram<br>N/A                                                                                                                                                                                                        |
| Descriptive data         | 14* | (a) Give characteristics of study participants (eg demographic, clinical, social) and information on exposures and potential confounders<br><b>Page 20</b>                                                                                       |
|                          |     | (b) Indicate number of participants with missing data for each variable of interest<br>N/A                                                                                                                                                       |
|                          |     | (c) Summarise follow-up time (eg, average and total amount)<br><b>Page 20</b>                                                                                                                                                                    |
| Outcome data             | 15* | Report numbers of outcome events or summary measures over time<br><b>Page 10 and page 20</b>                                                                                                                                                     |
| Main results             | 16  | (a) Give unadjusted estimates and, if applicable, confounder-adjusted estimates and their precision (eg, 95% confidence interval). Make clear which confounders were adjusted for and why they were included<br><b>Page 10-11 and page 21-23</b> |
|                          |     | (b) Report category boundaries when continuous variables were categorized<br>N/A                                                                                                                                                                 |
|                          |     | (c) If relevant, consider translating estimates of relative risk into absolute risk for a meaningful time period<br>N/A                                                                                                                          |
| Other analyses           | 17  | Report other analyses done—eg analyses of subgroups and interactions, and sensitivity analyses<br><b>Page 11 and page 24</b>                                                                                                                     |
| <b>Discussion</b>        |     |                                                                                                                                                                                                                                                  |
| Key results              | 18  | Summarise key results with reference to study objectives<br><b>Page 2 and page 12 – 16</b>                                                                                                                                                       |
| Limitations              | 19  | Discuss limitations of the study, taking into account sources of potential bias or imprecision. Discuss both direction and magnitude of any potential bias<br><b>Page 2 and page 12</b>                                                          |
| Interpretation           | 20  | Give a cautious overall interpretation of results considering objectives, limitations, multiplicity of analyses, results from similar studies, and other relevant evidence<br><b>Page 12 – 16</b>                                                |
| Generalisability         | 21  | Discuss the generalisability (external validity) of the study results<br><b>Page 15</b>                                                                                                                                                          |
| <b>Other information</b> |     |                                                                                                                                                                                                                                                  |
| Funding                  | 22  | Give the source of funding and the role of the funders for the present study and, if applicable, for the original study on which the present article is based<br><b>Page 16</b>                                                                  |

\*Give information separately for exposed and unexposed groups.



**Quality of medical care and excess mortality in psychiatric patients – a nationwide register-based study in Sweden**

|                                 |                                                                                                                                                                                                                                                                                                                                                                                                                                                                                                                                                                                                                                                                                                                                                                                                                                                                                                                                                                         |
|---------------------------------|-------------------------------------------------------------------------------------------------------------------------------------------------------------------------------------------------------------------------------------------------------------------------------------------------------------------------------------------------------------------------------------------------------------------------------------------------------------------------------------------------------------------------------------------------------------------------------------------------------------------------------------------------------------------------------------------------------------------------------------------------------------------------------------------------------------------------------------------------------------------------------------------------------------------------------------------------------------------------|
| Journal:                        | <i>BMJ Open</i>                                                                                                                                                                                                                                                                                                                                                                                                                                                                                                                                                                                                                                                                                                                                                                                                                                                                                                                                                         |
| Manuscript ID:                  | bmjopen-2011-000778.R1                                                                                                                                                                                                                                                                                                                                                                                                                                                                                                                                                                                                                                                                                                                                                                                                                                                                                                                                                  |
| Article Type:                   | Research                                                                                                                                                                                                                                                                                                                                                                                                                                                                                                                                                                                                                                                                                                                                                                                                                                                                                                                                                                |
| Date Submitted by the Author:   | 25-Jan-2012                                                                                                                                                                                                                                                                                                                                                                                                                                                                                                                                                                                                                                                                                                                                                                                                                                                                                                                                                             |
| Complete List of Authors:       | Björkenstam, Emma; Karolinska Institutet, Department of Public Health Sciences, Division of Social Medicine; National Board of Health and Welfare, Department of Statistics, Monitoring and Evaluation<br>Ljung, Rickard; Karolinska Institutet, Department of Public Health Sciences, Division of Social Medicine; National Board of Health and Welfare, Department of Statistics, Monitoring and Evaluation<br>Burström, Bo; Karolinska Institutet, Department of Public Health Sciences, Division of Social Medicine<br>Mittendorfer-Rutz, Ellenor; Karolinska Institutet, Department of Clinical Neuroscience, Division of Insurance Medicine<br>Hallqvist, Johan; Karolinska Institutet, Department of Public Health Sciences, Division of Public Health Epidemiology; Uppsala University, Department of Public Health and Caring Sciences<br>Ringbäck Weitoft, Gunilla; National Board of Health and Welfare, Department of Statistics, Monitoring and Evaluation |
| <b>Primary Subject Heading</b>: | Mental health                                                                                                                                                                                                                                                                                                                                                                                                                                                                                                                                                                                                                                                                                                                                                                                                                                                                                                                                                           |
| Secondary Subject Heading:      | Epidemiology, Public health                                                                                                                                                                                                                                                                                                                                                                                                                                                                                                                                                                                                                                                                                                                                                                                                                                                                                                                                             |
| Keywords:                       | EPIDEMIOLGY, MENTAL HEALTH, SOCIAL MEDICINE                                                                                                                                                                                                                                                                                                                                                                                                                                                                                                                                                                                                                                                                                                                                                                                                                                                                                                                             |
|                                 |                                                                                                                                                                                                                                                                                                                                                                                                                                                                                                                                                                                                                                                                                                                                                                                                                                                                                                                                                                         |

SCHOLARONE™  
Manuscripts

1  
2  
3  
4  
5  
6  
7  
8  
9  
10  
11  
12  
13  
14  
15  
16  
17  
18  
19  
20  
21  
22  
23  
24  
25  
26  
27  
28  
29  
30  
31  
32  
33  
34  
35  
36  
37  
38  
39  
40  
41  
42  
43  
44  
45  
46  
47  
48  
49  
50  
51  
52  
53  
54  
55  
56  
57  
58  
59  
60

## Quality of medical care and excess mortality in psychiatric patients – a nationwide register-based study in Sweden

Emma Björkenstam BSc<sup>1,2</sup>, Rickard Ljung M.D., MPH, PhD<sup>1,2,3</sup>, Bo Burström M.D., PhD<sup>1</sup>, Ellenor Mittendorfer-Rutz PhD<sup>4</sup>, Johan Hallqvist M.D., PhD<sup>5,6</sup>, Gunilla Ringbäck Weitoft PhD<sup>2</sup>

<sup>1</sup> Department of Public Health Sciences, Division of Social Medicine, Karolinska Institutet, Stockholm, Sweden

<sup>2</sup> Department of Statistics, Monitoring and Evaluation, National Board of Health and Welfare, Stockholm, Sweden

<sup>3</sup> Upper Gastrointestinal Research, Department of Molecular Medicine and Surgery, Karolinska Institutet, Stockholm, Sweden

<sup>4</sup> Department of Clinical Neuroscience, Division of Insurance Medicine, Karolinska Institutet, Stockholm, Sweden

<sup>5</sup> Department of Public Health Sciences, Division of Public Health Epidemiology, Karolinska Institutet, Stockholm, Sweden

<sup>6</sup> Department of Public Health and Caring Sciences, Uppsala University, Uppsala, Sweden

Corresponding author: Emma Björkenstam

National Board of Health and Welfare, SE-106 30 Stockholm, Sweden

Telephone: +46 75 247 31 93, fax: +46 75 247 32 52

E-mail: [emma.bjorkenstam@socialstyrelsen.se](mailto:emma.bjorkenstam@socialstyrelsen.se)

**Key words:** quality of health care, mental disorders/mortality, cohort studies, hospitalization, cause of death

Word count: 2 847

## ARTICLE SUMMARY

### Article focus:

- To investigate whether psychiatric patients have higher overall and cause-specific mortality
- To study whether the quality of somatic care for psychiatric patients is different from the care provided to patients with no concurrent mental disorder.

### Key messages:

- This study shows a marked increase in excess mortality in mentally ill men and women.
- The findings suggest a lower quality of health care in the treatment of somatic disorders in psychiatric patients regarding the indicators studied.
- Careful medical examination of psychiatric patients together with efforts to promote a healthier life style may be of great importance in order to prevent, detect, and treat somatic disease.

### Strengths and limitations:

- The strengths of the study include the population-based design, using national registers with high completeness
- We were unable to study the effects of health-related behaviors such as excessive alcohol consumption or tobacco smoking, which is a limitation.

## ABSTRACT

**Objective:** To assess overall and cause-specific mortality, and the quality of somatic care among psychiatric patients.

**Design:** A register-based cohort study

**Setting:** All individuals aged 20-79 in Sweden in 2005.

**Participants:** In total 6 294 339 individuals.

**Primary outcome measure:** The individuals were followed for mortality in 2006 and 2007, generating 72 187 deaths. Psychiatric patients were grouped according to their diagnosis in the National Patient Register. Mortality risk of psychiatric patients was compared to that of non-psychiatric patients. Estimates of relative risk of mortality were calculated as incidence rate ratios (IRRs) with 95% confidence intervals (CIs) using Poisson regression analysis. Psychiatric patients were compared with non-psychiatric patients for three health care quality indicators: the proportion of avoidable hospitalisations, case fatality rate after myocardial infarction, and statin use among diabetic patients.

**Results:** Compared to individuals with no episodes of treatment for mental disorder, psychiatric patients had a substantially increased risk of all studied death-causes as well as death from conditions considered amenable to intervention by the health service, i.e. avoidable mortality. The highest mortality was found among those with another mental disorder, predominantly substance abuse (for women, an IRR of 4.7 (95% CI 4.3 to 5.0), and for men an IRR of 4.8 (95% CI 4.6 to 5.0)).

The analysis of quality of somatic care revealed lower levels of health care quality for psychiatric patients, signalling failures in public health and medical care.

**Conclusion:** This study shows a marked increase in excess mortality, suggesting a lower quality of somatic health care in psychiatric patients.

## INTRODUCTION

Psychiatric patients have been reported to have higher mortality rates and shorter life expectancy compared to the general population.<sup>1-6</sup> This applies especially to patients with severe psychiatric diseases, such as schizophrenia<sup>7-10</sup> and bipolar disorder.<sup>11,12</sup>

The highest risks have been found among patients with substance abuse.<sup>3,5,13,14</sup>

Psychiatric patients have a particularly pronounced risk of suicide.<sup>15-18</sup> Cardiovascular disease is also a major cause of excess deaths, partly due to a higher prevalence of smoking, obesity and hypertension.<sup>19-21</sup> There are conflicting data on cancer incidence and mortality in psychiatric patients, although most studies suggest that while cancer mortality is higher, incidence is no different from that of the general population.<sup>22,23</sup>

Other potential explanations for the excess mortality are differences in access, provision and quality of somatic health care.<sup>24</sup> For instance, it has been shown that people with a diagnosis of a mental disorder have less access to primary health care.<sup>25</sup>

Lower quality of diabetes care<sup>26</sup> and cardiovascular procedures<sup>19,27,28</sup> have also been documented. In Sweden, different indicators are often used as measures reflecting health care quality.<sup>29</sup>

The concept of avoidable mortality was introduced in 1976 as an indicator of quality of health care.<sup>30</sup> Avoidable mortality measures deaths that could be argued to have been avoidable either by the health care system or by public health interventions, and has been applied in comparisons between regions, populations and over time.

Psychiatric patients have been shown to have higher avoidable mortality rates than the general population,<sup>13,31</sup> and questions have been raised as to whether the medical care of physical disorders provided to psychiatric patients is less adequate than for the population in general.<sup>32</sup>

1  
2  
3  
4  
5  
6  
7  
8  
9  
10  
11  
12  
13  
14  
15  
16  
17  
18  
19  
20  
21  
22  
23  
24  
25  
26  
27  
28  
29  
30  
31  
32  
33  
34  
35  
36  
37  
38  
39  
40  
41  
42  
43  
44  
45  
46  
47  
48  
49  
50  
51  
52  
53  
54  
55  
56  
57  
58  
59  
60

The aim of this study was to investigate whether psychiatric patients have higher overall and cause-specific mortality, and whether the quality of somatic care for psychiatric patients is different from the care provided to patients with no concurrent mental disorder.

Results are reported with regard to age, sex, mental disorder, and comorbid substance abuse disorders.

For peer review only



## METHOD

### Study population

The study population comprised individuals alive and registered in Sweden in 2004 and 2005, aged 20-79 i.e. those born between 1926 and 1985. After excluding individuals diagnosed with mental retardation (as defined by the International Classification of Diseases, tenth revision (ICD-10): F70-F79) the study population comprised 6 294 339 individuals. The cohort was followed from January 1, 2006 until December 31, 2007. We used the unique personal identity number assigned to each Swedish citizen or permanent resident to link information from four population-based registers.<sup>33</sup>

### Types of mental disorder

We identified all individuals recorded with a principal psychiatric diagnostic code as defined by the ICD-10 F04-F99 (i.e. dementia excluded, besides mental retardation) in inpatient care or specialised outpatient care in 2004 or 2005 in the National Patient Register. The National Patient Register covers all inpatient care in Sweden since 1987 (psychiatric inpatient care since 1973, where both alcohol and drugs services are included) and all specialised outpatient care since 2001. If a patient had more than one discharge or outpatient visit, the principal diagnoses from all discharges and outpatient visits were kept to further categorise patients. Five mutually exclusive exposure groups were created according to a hierarchy of diagnoses: *i*) schizophrenia and other non-affective psychoses (diagnosis codes F20-F29), *ii*) affective disorder (F30-F39), *iii*) anxiety disorder (F40-F48), *iv*) other psychiatric diagnoses, (F04-F99 except for diagnoses above), *v*) persons without inpatient and outpatient care due to mental disorder served as the reference group.

1  
2  
3  
4  
5  
6  
7  
8  
9  
10  
11  
12  
13  
14  
15  
16  
17  
18  
19  
20  
21  
22  
23  
24  
25  
26  
27  
28  
29  
30  
31  
32  
33  
34  
35  
36  
37  
38  
39  
40  
41  
42  
43  
44  
45  
46  
47  
48  
49  
50  
51  
52  
53  
54  
55  
56  
57  
58  
59  
60

Psychiatric in- or outpatient care due to substance abuse disorder was also studied in a sub-analysis and was divided into categories according to whether the substance abuse was attributed to alcohol (F10), narcotic-related drugs (F11-F19), or both.

As certain mental disorders, e.g. bipolar disorder and schizophrenia are highly comorbid with alcohol and other substance abuse,<sup>34</sup> schizophrenia/other non-affective psychoses, affective or anxiety disorder were analysed with and without a coexisting substance abuse disorder (attributed to either alcohol or narcotics-related drugs). In these analyses, persons without inpatient and outpatient care due to mental disorder served as the reference group.

#### **Causes of death**

The underlying cause of death, coded according to the ICD-10, was obtained from the Causes of Death Register. This register contains information on all deceased Swedish residents since 1952 and has a very high coverage. Since 1997 all deceased have been included, though for 0.5% there is a lack of medical information.

Causes of death were grouped as follows: ischemic heart disease (IHD) (diagnosis codes I20-I25), cancer (C00-C97), suicide and death with undetermined intent (X60-X84 and Y10-Y34), and external causes of death (suicide excluded) (V01-Y89 (except for X60-X84, Y10-Y34)). The indicators of avoidable mortality were divided into causes of death reflecting the outcome of medical care, and causes reflecting the effect of the national health policy. The following diseases were included as medical care indicators: typhoid (A01.0), tetanus (A35), tuberculosis (A15-A19 and B90), malignant neoplasm of cervix uteri (C53), Hodgkin's disease (C81), diabetes (E10-E14), chronic rheumatic heart disease (I05-I09), hypertensive disease (I10-I15), stroke (I60-I69), asthma (J45-J46), appendicitis (K35-K38), abdominal hernia (K40-K45), cholelithiasis and cholecystitis (K80-K81 and K83.0), maternal deaths (O00-

1  
2  
3  
4  
5  
6  
7 O99), and osteomyelitis (M86-M87). Malignant neoplasms of the oesophagus (C15),  
8 malignant neoplasms of the trachea, bronchus or lung (C34), cirrhosis of the liver  
9 (K70 and K73-K74), and motor vehicle accidents (V00-V99) were included as  
10 national health policy indicators.  
11

### 12 13 14 **Health care quality indicators**

15  
16 In analyses of indicators presumably reflecting aspects of health care quality, the age-  
17 span was restricted to individuals aged 40-79, because the studied outcomes are rare  
18 in younger individuals. The indicator regarding avoidable hospitalisation is based on  
19 the assumption that unnecessary hospitalisation can be avoided if patients with  
20 selected conditions receive proper outpatient care. This indicator includes  
21 hospitalisations for some chronic conditions (anaemia, asthma, diabetic  
22 complications, heart failure, hypertension, chronic obstructive lung disease, and  
23 angina pectoris), and hospitalisations for some acute conditions (bleeding ulcers,  
24 diarrhoea, epileptic seizures, inflammatory diseases of the female pelvic organs,  
25 pyelitis, and ear, nose and throat infection). The indicator regarding 28-day case  
26 fatality rate after myocardial infarction is an internationally established indicator of  
27 how well the health care system handles acute care after myocardial infarction. As a  
28 third indicator, the proportion on treatment with lipid lowering drugs was measured  
29 among patients receiving diabetes drugs. This treatment ought to be especially  
30 important for diabetes patients, due to the many risk factors in this population. All  
31 three indicators have been described elsewhere.<sup>29</sup>  
32  
33  
34  
35  
36  
37  
38  
39  
40  
41  
42  
43  
44  
45  
46

### 47 **Statistical analysis**

48  
49 Poisson regression analyses, adjusted for age, were used to evaluate the association  
50 between mental disorder, mortality, and indicators of quality of health care. As a  
51 measure of the relative occurrence of death we used the incidence rate ratio (IRR).  
52  
53  
54  
55

1  
2  
3  
4  
5  
6  
7 We assessed person-years at risk by adding up the years the individuals were alive  
8 and living in Sweden during the follow-up period. SAS Genmod procedure was used  
9 to calculate IRRs with 95% confidence intervals (CI). SAS Enterprise Guide 4.2  
10 (SAS Institute Inc. Cary, NC, USA) was used. Age-standardised percentages were  
11 calculated when analysing differences regarding health care quality.  
12  
13  
14  
15  
16  
17  
18  
19  
20  
21  
22  
23  
24  
25  
26  
27  
28  
29  
30  
31  
32  
33  
34  
35  
36  
37  
38  
39  
40  
41  
42  
43  
44  
45  
46  
47  
48  
49  
50  
51  
52  
53  
54  
55  
56  
57  
58  
59  
60

## RESULTS

Cohort characteristics for the 6 294 339 individuals, (3 141 454 women and 3 152 885 men) are presented in table 1. In total, 101 500 women and 90 946 men were treated for mental disorder in 2004 or 2005. About 11% of mentally ill women had a diagnosis of schizophrenia and other non-affective psychoses, 37% affective disorders, 32% anxiety disorder, and 20% other psychiatric diagnoses, and for men 13%, 26%, 23%, and 37% respectively. Almost three quarters of the men (73%) included in the group for other mental disorders were treated for substance abuse.

Among all psychiatric patients, 5 498 (2.9% in all, 2% in women, and 4% in men respectively) died during the follow-up period, compared to 66 689 (1.1% in all, 0.9% in women, and 1.3% in men) among persons without episodes of treatment for mental disorder.

The IRRs for different causes of death and by mental disorder for both sexes are shown in table 2. When compared to the general population, mortality was considerably higher among all categories of mental disorder and for all causes of death. The highest excess mortality was found among individuals in the category comprised of having another mental disorder, predominantly substance abuse, (for women, an IRR of 4.7 (95 % CI 4.3 to 5.0), and for men an IRR of 4.8 (95% CI 4.6 to 5.0)).

The IRRs for different causes of death presented in table 3 show that, regardless of mental disorder, those with comorbid substance abuse disorders had the highest mortality risk.

Women treated for both alcohol-related and drug-related substance abuse had the highest risk for premature death, except for cancer and avoidable mortality (table 4).

1  
2  
3  
4  
5  
6  
7 Except for cancer, men treated for both alcohol-related and drug-related substance  
8 abuse had the highest risk for premature death in all studied causes of death.

9  
10 Separate analyses of different age groups 20-44, 45-64, and 65-79, showed that the  
11 younger the patient, the more pronounced increased risk for premature death (data not  
12 shown). This was true for all categories of mental disorder and for all studied causes  
13 of death, except for suicide.

14  
15 The majority of patients (78% of women and 77% of men) with affective and anxiety  
16 disorders had been treated in outpatient care only. For the other disorders, around half  
17 of the patients had been treated in outpatient care only. Mortality rates were higher  
18 among those hospitalised than those treated in outpatient care. This was true for all  
19 categories of mental disorders and for all causes of death (data not shown).

20  
21 The different health care quality indicators are presented in table 5. The percentage of  
22 avoidable admissions was higher among people treated for mental disorder, for  
23 women spanning from 2.4% to 4.1% (compared to 1.1% for those without episodes of  
24 treatment for mental disorder), and for men spanning from 3.4% to 5.4% (compared  
25 to 1.6%). Psychiatric patients had a higher 28-day case fatality rate for myocardial  
26 infarction, especially those treated for schizophrenia and other non-affective  
27 psychoses (women 53.5% (42.0-65.0) and men 51.4% (40.4-62.3)), compared to  
28 26.5% of women (25.7-27.3) and 28.1% (27.5-28.6) of men not treated for mental  
29 disorder. The indicator on lipid lowering drug therapy shows that psychiatric patients  
30 with diabetes were given lipid lowering drugs to a lesser extent than diabetic patients  
31 without a concurrent mental disorder; this was particularly evident among both  
32 women and men with schizophrenia and other non-affective psychoses.  
33  
34  
35  
36  
37  
38  
39  
40  
41  
42  
43  
44  
45  
46  
47  
48  
49  
50

## DISCUSSION

Our study of more than 6 million women and men shows that psychiatric patients had a substantially increased risk of death compared to individuals with no episodes of treatment for mental disorder, regardless of cause of death. Overall, people with schizophrenia and other non-affective psychoses, and people treated for substance abuse disorder had the highest risk for premature death. Psychiatric patients also had higher rates of potentially avoidable hospitalisations, higher case fatality rate after myocardial infarction, and lower use of lipid lowering therapy in diabetes.

The strengths of the study include the population-based design, using national registers with high completeness. The validity in the Causes of Death Register is very high, where information of cause of death is lacking in only 0.5% of the deceased.<sup>35</sup>

The National Patient Register has close to complete coverage of all inpatient care. However in 2005 around 40% of psychiatric outpatient visits were not included, hence some patients who were treated in outpatient care are classified as unexposed,

as there is no record of their outpatient visit. Also, as the National Patient Register does not cover primary care we were not able to study all levels of psychiatric care. Hence, patients treated for mental health problems solely in primary care are classified as unexposed. Assuming a similar effect for patients in primary care as for psychiatric patients in our study selected by a more strict definition of mental health problems, i.e. patients who have seen a psychiatrist, this misclassification will dilute our results towards the null. We were unable to study the effects of health-related behaviours such as excessive alcohol consumption or tobacco smoking, which is a limitation.

We found that psychiatric patients were at higher risk of premature death from IHD, particularly among those treated for schizophrenia and other non-affective psychoses.

1  
2  
3  
4  
5  
6  
7 This has previously been shown in other settings,<sup>10,11,19,20</sup> and recently a study  
8 showed that the excess cardiovascular mortality among schizophrenia patients has  
9 increased over the past 25 years.<sup>7</sup> We also found an elevated risk for cancer mortality,  
10 although to a lesser extent, in particular in patients treated for schizophrenia and other  
11 non-affective psychoses and substance abuse disorders. Studies evaluating cancer  
12 incidence and mortality at the same time have shown that, while individuals with  
13 mental disorder did not show any increased incidence rate for many types of cancer,  
14 they did have higher cancer mortality, which might be explained by delays in  
15 detection,<sup>23,36</sup> disparities in screening for cancer,<sup>22</sup> and treatment compliance.<sup>37</sup>

16  
17  
18  
19  
20  
21  
22  
23  
24 Psychiatric patients had an elevated risk of premature death from conditions  
25 considered amenable to intervention by the health service, i.e. avoidable mortality,  
26 compared to those not treated in psychiatric care. In particular, those treated for  
27 schizophrenia with comorbid substance abuse disorder had a higher risk, which has  
28 been shown by others.<sup>13,31</sup>

29  
30  
31  
32  
33  
34  
35  
36  
37  
38  
39  
40  
41  
42  
43  
44  
45  
46  
47  
48  
49  
50  
51  
52  
53  
54  
55  
56  
57  
58  
59  
60  
In line with previous studies, we found psychiatric patients to have significantly  
higher suicide risk, in particular those treated for schizophrenia and other non-  
affective psychosis, and affective disorder, and especially those treated with a  
comorbid substance abuse disorder.<sup>17</sup>

Mentally ill patients also had substantially increased risk of deaths from external  
causes when suicide was excluded. Studies have shown that people with mental  
disorder are at greater risk of accidental and violent death, particularly when alcohol  
and drug comorbidities are involved.<sup>38</sup> As mentioned earlier, our results showed that  
mentally ill individuals with a coexisting substance abuse disorder have significantly  
higher risk for premature death. When we excluded those with a coexisting substance  
abuse disorder, the increased mortality risk remained for all diagnosis groups except



1  
2  
3  
4  
5  
6  
7 for schizophrenia and other non-affective psychosis, but with lower estimates (data  
8 not shown).

9  
10  
11 Consistent with previous research, substance abuse disorders strongly contributed to  
12 premature death among both female and male psychiatric patients, especially for  
13 those with both alcohol and drug abuse.  
14

15  
16 When studying a set of indicators aimed to reflect the outcome of health care quality,  
17 we found that patients with a mental disorder had higher rates of potentially avoidable  
18 hospitalisations. Under some circumstances hospitalization is necessary and well  
19 motivated, but for most studied diseases, it is a failure. A recent study on avoidable  
20 hospitalisation demonstrated that the quality of physical health care received by  
21 patients with schizophrenia was poorer than that of the general population, signalling  
22 failures in public health and medical care<sup>34</sup>.  
23  
24  
25  
26  
27  
28

29  
30 The indicator of 28-day case fatality rate after myocardial infarction showed worse  
31 outcome for those with a mental disorder. In a Danish study,<sup>19</sup> less somatic  
32 hospitalisation than needed, and less use of invasive heart disease procedures among  
33 persons with severe mental disorder than among the general population were  
34 suggested as additional reasons for their excess mortality in IHD.  
35  
36  
37  
38

39  
40 Another finding was the low percentage of lipid lowering drugs given to diabetic  
41 patients with a concurrent mental disorder. As drug therapy against lipid disorders is  
42 particularly important in diabetic patients,<sup>39</sup> this is a clear indication of inequality in  
43 health care.  
44  
45

46  
47 Disparities in access to and utilisation of health care, as well as the quality of health  
48 care provision may contribute to inequalities in health.<sup>40</sup> One reason for these  
49 disparities could be that a person with mental disorder may not be able to effectively  
50 communicate and express concerns because of cognitive disturbance. Also,  
51  
52  
53  
54

1  
2  
3  
4  
5  
6  
7 psychiatrists and other mental health providers may prioritise psychiatric issues and  
8 neglect physical problems.<sup>41</sup> There is also some evidence of inequalities in case  
9 recognition and quality of medical care for psychiatric patients, where general  
10 practitioners might minimise the clinical significance of physical complaints when  
11 assessing and treating patients with a mental disorder; a process known as diagnostic  
12 overshadowing.<sup>42</sup> As there is excess mortality across a wide range of mental  
13 disorders, somatic care should be improved for all psychiatric patients, regardless of  
14 the severity of the mental disorder.

15  
16  
17  
18  
19  
20  
21  
22 In addition to inequalities in utilisation and quality of health care, there are many  
23 factors that contribute to poor physical health in people with a mental disorder,  
24 including health-related behaviours and medication side-effects. The increased  
25 morbidity and mortality seen in this population are largely due to a higher prevalence  
26 of modifiable risk factors, many of which are related to health-related behaviours.  
27 The use of alcohol and illicit drugs is more common among psychiatric patients. It is  
28 also known that psychiatric patients smoke to a larger extent,<sup>3,43</sup> which could be an  
29 explanation for the increased mortality in IHD and cancer. Regardless of the kind of  
30 mental disorder, we found psychiatric patients to have an increased risk of dying in  
31 smoking-related cancer (data not shown). An unhealthy diet may also elevate the risk  
32 of various somatic diseases and thus increase the risk of death. The effects of these  
33 health-related behaviours have all been proposed as possible causative factors for  
34 excess mortality.<sup>44</sup> Also, medications used to treat severe mental disorder may  
35 increase the risk of diabetes and cardiovascular disease, as most mood stabilisers are  
36 associated with weight gain.<sup>12,45</sup> However, these factors make careful monitoring of  
37 the physical health status of patients with mental disorders even more important.

## 38 39 40 41 42 43 44 45 46 47 48 49 50 51 52 **Conclusion**

1  
2  
3  
4  
5  
6  
7 This study shows a marked increase in excess mortality in mentally ill men and  
8 women. This was especially evident in individuals with a comorbid substance abuse  
9 disorder. The findings also suggest a lower quality of health care in the treatment of  
10 somatic disorders in psychiatric patients. Careful medical examination of psychiatric  
11 patients together with efforts to promote a healthier life style may be of great  
12 importance in order to prevent, detect, and treat somatic disease.  
13  
14  
15  
16  
17  
18  
19

## 20 **ACKNOWLEDGEMENTS**

21 We thank Dr. Robert Bodén and Dr. Herman Holm for excellent advice.  
22

## 23 **FUNDING**

24 Ellenor Mittendorfer Rutz is the recipient of the Assistant Professor grant from the  
25 Swedish Research Council.  
26  
27  
28  
29

## 30 **COMPETING INTERESTS**

31 There are no competing interests.  
32

## 33 **CONTRIBUTORSHIP STATEMENT**

34 EB, GWR and RL originated the idea. EB analyzed the data and wrote the manuscript  
35 draft. All authors contributed the interpretation of the results and to the writing of the  
36 final manuscript.  
37  
38  
39  
40  
41  
42  
43  
44  
45  
46  
47  
48  
49  
50  
51  
52  
53  
54  
55

## References

1. D'Avanzo B, La Vecchia C, Negri E. Mortality in long-stay patients from psychiatric hospitals in Italy--results from the Qalyop Project. *Soc Psychiatry Psychiatr Epidemiol* 2003;38:385-9.
2. Grigoletti L, Perini G, Rossi A, et al. Mortality and cause of death among psychiatric patients: a 20-year case-register study in an area with a community-based system of care. *Psychol Med* 2009;39:1875-84.
3. Harris EC, Barraclough B. Excess mortality of mental disorder. *Br J Psychiatry* 1998;173:11-53.
4. Kisely S, Smith M, Lawrence D, Maaten S. Mortality in individuals who have had psychiatric treatment: population-based study in Nova Scotia. *Br J Psychiatry* 2005;187:552-8.
5. Meloni D, Miccinesi G, Bencini A, et al. Mortality among discharged psychiatric patients in Florence, Italy. *Psychiatr Serv* 2006;57:1474-81.
6. Miller BJ, Paschall CB, 3rd, Svendsen DP. Mortality and medical comorbidity among patients with serious mental illness. *Psychiatr Serv* 2006;57:1482-7.
7. Brown S, Kim M, Mitchell C, Inskip H. Twenty-five year mortality of a community cohort with schizophrenia. *Br J Psychiatry* 2010;196:116-21.
8. McGrath J, Saha S, Chant D, Welham J. Schizophrenia: a concise overview of incidence, prevalence, and mortality. *Epidemiol Rev* 2008;30:67-76.
9. Saha S, Chant D, McGrath J. A systematic review of mortality in schizophrenia: is the differential mortality gap worsening over time? *Arch Gen Psychiatry* 2007;64:1123-31.
10. Osby U, Correia N, Brandt L, Ekblom A, Sparen P. Mortality and causes of death in schizophrenia in Stockholm county, Sweden. *Schizophr Res* 2000;45:21-8.
11. Osby U, Brandt L, Correia N, Ekblom A, Sparen P. Excess mortality in bipolar and unipolar disorder in Sweden. *Arch Gen Psychiatry* 2001;58:844-50.
12. Roshanaei-Moghaddam B, Katon W. Premature mortality from general medical illnesses among persons with bipolar disorder: a review. *Psychiatr Serv* 2009;60:147-56.
13. Ringback Weitoft G, Gullberg A, Rosen M. Avoidable mortality among psychiatric patients. *Soc Psychiatry Psychiatr Epidemiol* 1998;33:430-7.
14. Rosen CS, Kuhn E, Greenbaum MA, Drescher KD. Substance abuse-related mortality among middle-aged male VA psychiatric patients. *Psychiatr Serv* 2008;59:290-6.
15. Carlborg A, Winnerback K, Jonsson EG, Jokinen J, Nordstrom P. Suicide in schizophrenia. *Expert Rev Neurother* 2010;10:1153-64.
16. Lester D. Sex differences in completed suicide by schizophrenic patients: a meta-analysis. *Suicide Life Threat Behav* 2006;36:50-6.
17. Limosin F, Loze JY, Philippe A, Casadebaig F, Rouillon F. Ten-year prospective follow-up study of the mortality by suicide in schizophrenic patients. *Schizophr Res* 2007;94:23-8.
18. Palmer BA, Pankratz VS, Bostwick JM. The lifetime risk of suicide in schizophrenia: a reexamination. *Arch Gen Psychiatry* 2005;62:247-53.
19. Laursen TM, Munk-Olsen T, Agerbo E, Gasse C, Mortensen PB. Somatic hospital contacts, invasive cardiac procedures, and mortality from heart disease in patients with severe mental disorder. *Arch Gen Psychiatry* 2009;66:713-20.

- 1  
2  
3  
4  
5  
6  
7 20. Lawrence D, Kisely S, Pais J. The epidemiology of excess mortality in  
8 people with mental illness. *Can J Psychiatry* 2010;55:752-60.
- 9 21. Lawrence DM, Holman CD, Jablensky AV, Hobbs MS. Death rate from  
10 ischaemic heart disease in Western Australian psychiatric patients 1980-1998. *Br J*  
11 *Psychiatry* 2003;182:31-6.
- 12 22. Howard LM, Barley EA, Davies E, et al. Cancer diagnosis in people  
13 with severe mental illness: practical and ethical issues. *Lancet Oncol* 2010;11:797-  
14 804.
- 15 23. Kisely S, Sadek J, MacKenzie A, Lawrence D, Campbell LA. Excess  
16 cancer mortality in psychiatric patients. *Can J Psychiatry* 2008;53:753-61.
- 17 24. Druss BG, Bradford WD, Rosenheck RA, Radford MJ, Krumholz HM.  
18 Quality of medical care and excess mortality in older patients with mental disorders.  
19 *Arch Gen Psychiatry* 2001;58:565-72.
- 20 25. Levinson Miller C, Druss BG, Dombrowski EA, Rosenheck RA.  
21 Barriers to primary medical care among patients at a community mental health center.  
22 *Psychiatr Serv* 2003;54:1158-60.
- 23 26. Frayne SM, Halanych JH, Miller DR, et al. Disparities in diabetes care:  
24 impact of mental illness. *Archives of internal medicine* 2005;165:2631-8.
- 25 27. Druss BG. Cardiovascular procedures in patients with mental disorders.  
26 *JAMA* 2000;283:3198-9.
- 27 28. Kisely S, Smith M, Lawrence D, Cox M, Campbell LA, Maaten S.  
28 Inequitable access for mentally ill patients to some medically necessary procedures.  
29 *CMAJ : Canadian Medical Association journal = journal de l'Association medicale*  
30 *canadienne* 2007;176:779-84.
- 31 29. National Board of Health and Welfare, Swedish Association of Local  
32 Authorities and Regions. Quality and Efficiency in Swedish Health Care. Regional  
33 Comparisons 2010; 2011.
- 34 30. Rutstein D, Berenberg W, Chalmers T, Child C, Fishman A, Perrin E.  
35 Measuring the quality of medical care. *N Engl J Med* 1976;294:582-8.
- 36 31. Amaddeo F, Barbui C, Perini G, Biggeri A, Tansella M. Avoidable  
37 mortality of psychiatric patients in an area with a community-based system of mental  
38 health care. *Acta Psychiatr Scand* 2007;115:320-5.
- 39 32. Sokal J, Messias E, Dickerson FB, et al. Comorbidity of medical  
40 illnesses among adults with serious mental illness who are receiving community  
41 psychiatric services. *J Nerv Ment Dis* 2004;192:421-7.
- 42 33. Ludvigsson JF, Otterblad-Olausson P, Pettersson BU, Ekblom A. The  
43 Swedish personal identity number: possibilities and pitfalls in healthcare and medical  
44 research. *Eur J Epidemiol* 2009;24:659-67.
- 45 34. Thornicroft G. *Shunned: Discrimination against people with mental*  
46 *illness*. New York, United States: Oxford University Press; 2006.
- 47 35. National Board of Health and Welfare. *Causes of Death 2010*.  
48 Stockholm, Sweden; 2011.
- 49 36. Lawrence D, Holman CD, Jablensky AV, Threlfall TJ, Fuller SA.  
50 Excess cancer mortality in Western Australian psychiatric patients due to higher case  
51 fatality rates. *Acta Psychiatr Scand* 2000;101:382-8.
- 52 37. Kunkel EJ, Woods CM, Rodgers C, Myers RE. Consultations for  
53 'maladaptive denial of illness' in patients with cancer: psychiatric disorders that result  
54 in noncompliance. *Psychooncology* 1997;6:139-49.
- 55 38. Gau SS, Cheng AT. Mental illness and accidental death. Case-control  
56 psychological autopsy study. *Br J Psychiatry* 2004;185:422-8.

Formatted: Swedish (Sweden)

Formatted: Swedish (Sweden)

- 1  
2  
3  
4  
5  
6  
7 39. Colhoun HM, Betteridge DJ. Treatment of lipid disorders in patients  
8 with diabetes. *Current treatment options in cardiovascular medicine* 2006;8:37-45.  
9 40. Lawrence D, Kisely S. Inequalities in healthcare provision for people  
10 with severe mental illness. *J Psychopharmacol* 2010;24:61-8.  
11 41. Kopp M, Fleischhacker WW, Sturz K, Ruedl G, Kumnig M, Rumpold  
12 G. Poor health behaviour and reduced quality of life of people treated with  
13 psychotropic drugs. *Hum Psychopharmacol* 2011;26:161-7.  
14 42. Jones S, Howard L, Thornicroft G. 'Diagnostic overshadowing': worse  
15 physical health care for people with mental illness. *Acta Psychiatr Scand*  
16 2008;118:169-71.  
17 43. Brown S, Birtwistle J, Roe L, Thompson C. The unhealthy lifestyle of  
18 people with schizophrenia. *Psychol Med* 1999;29:697-701.  
19 44. Brown S, Inskip H, Barraclough B. Causes of the excess mortality of  
20 schizophrenia. *Br J Psychiatry* 2000;177:212-7.  
21 45. De Hert M, Correll CU, Bobes J, et al. Physical illness in patients with  
22 severe mental disorders. I. Prevalence, impact of medications and disparities in health  
23 care. *World Psychiatry* 2011;10:52-77.  
24  
25  
26  
27  
28  
29  
30  
31  
32  
33  
34  
35  
36  
37  
38  
39  
40  
41  
42  
43  
44  
45  
46  
47  
48  
49  
50  
51  
52  
53  
54  
55  
56  
57  
58  
59  
60

Table 1. Cohort characteristics

|                                                              | Women                                           |                    |                  |                       |                    | Men                                             |                    |                  |                       |                    | N              |
|--------------------------------------------------------------|-------------------------------------------------|--------------------|------------------|-----------------------|--------------------|-------------------------------------------------|--------------------|------------------|-----------------------|--------------------|----------------|
|                                                              | Schizophrenia and other non-affective psychoses | Affective disorder | Anxiety disorder | Other mental disorder | No mental disorder | Schizophrenia and other non-affective psychoses | Affective disorder | Anxiety disorder | Other mental disorder | No mental disorder |                |
| N                                                            | 11 165                                          | 37 245             | 32 690           | 20 400                | 3 039 954          | 11 993                                          | 23 762             | 21 209           | 33 982                | 3 061 939          | 6 294 339      |
| %                                                            | 0.2                                             | 0.6                | 0.5              | 0.3                   | 48.3               | 0.2                                             | 0.4                | 0.3              | 0.5                   | 48.6               |                |
| Mean age (SD)                                                | 50.1 (13.6)                                     | 46.1 (15.6)        | 42.4 (14.3)      | 43.8 (16.4)           | 48.1 (16.0)        | 45.8 (13.0)                                     | 46.9 (14.9)        | 42.0 (13.4)      | 47.2 (15.2)           | 47.2 (15.6)        | 47.6 (15.8)    |
| Person-years                                                 | 21 923                                          | 73 620             | 64 788           | 40 039                | 6 017 464          | 23 463                                          | 46 604             | 41 790           | 65 925                | 6 042 510          | 12 438 126     |
| <b>Causes of death</b>                                       |                                                 |                    |                  |                       |                    |                                                 |                    |                  |                       |                    |                |
| All-cause mortality                                          | 344 (3.1 %)                                     | 669 (1.8 %)        | 413 (1.3 %)      | 638 (3.1 %)           | 27 421 (0.9 %)     | 459 (3.8 %)                                     | 764 (3.2 %)        | 389 (1.8 %)      | 1 822 (5.4 %)         | 39 268 (1.3 %)     | 72 187 (1.1 %) |
| Avoidable mortality: Medical Care Indicators                 | 34 (0.3 %)                                      | 68 (0.2 %)         | 36 (0.1 %)       | 54 (0.3 %)            | 3 125 (0.1 %)      | 30 (0.3 %)                                      | 78 (0.3 %)         | 28 (0.1 %)       | 140 (0.4 %)           | 3 904 (0.1 %)      | 7 497 (0.1 %)  |
| Avoidable mortality: National Health Policy Indicators       | 22 (0.2 %)                                      | 57 (0.2 %)         | 43 (0.1 %)       | 89 (0.4 %)            | 2 859 (0.1 %)      | 34 (0.3 %)                                      | 41 (0.2 %)         | 38 (0.2 %)       | 226 (0.7 %)           | 4 062 (0.1 %)      | 7 471 (0.1 %)  |
| Ischemic heart disease                                       | 42 (0.4 %)                                      | 68 (0.2 %)         | 47 (0.1 %)       | 72 (0.4 %)            | 3 279 (0.1 %)      | 79 (0.7 %)                                      | 117 (0.5 %)        | 68 (0.3 %)       | 280 (0.8 %)           | 7 878 (0.3 %)      | 11 930 (0.2 %) |
| Cancer (all types)                                           | 83 (0.7 %)                                      | 163 (0.4 %)        | 129 (0.4 %)      | 111 (0.5 %)           | 12 369 (0.4 %)     | 65 (0.5 %)                                      | 136 (0.6 %)        | 71 (0.3 %)       | 247 (0.7 %)           | 13 636 (0.4 %)     | 27 010 (0.4 %) |
| Suicide                                                      | 42 (0.4 %)                                      | 117 (0.3 %)        | 71 (0.2 %)       | 73 (0.4 %)            | 439 (0.0 %)        | 79 (0.7 %)                                      | 167 (0.7 %)        | 69 (0.3 %)       | 174 (0.5 %)           | 1 259 (0.0 %)      | 2 490 (0.0 %)  |
| Deaths from external causes (suicide excluded)               | 15 (0.1 %)                                      | 44 (0.1 %)         | 27 (0.1 %)       | 47 (0.2 %)            | 652 (0.0 %)        | 39 (0.3 %)                                      | 67 (0.3 %)         | 48 (0.2 %)       | 232 (0.7 %)           | 1 867 (0.1 %)      | 3 038 (0.0 %)  |
| <b>Health care quality indicators*</b>                       |                                                 |                    |                  |                       |                    |                                                 |                    |                  |                       |                    |                |
| Avoidable inpatient medical care                             | 8 413                                           | 22 833             | 17 078           | 11 171                | 1 961 968          | 7 864                                           | 15 502             | 11 126           | 22 762                | 1 931 860          | 4 010 577      |
| Number treated in 2006                                       | 234                                             | 521                | 409              | 445                   | 22 433             | 235                                             | 474                | 341              | 1 189                 | 29 159             | 55 440         |
| Myocardial infarction - 28-day case fatality                 |                                                 |                    |                  |                       |                    |                                                 |                    |                  |                       |                    | 36 171         |
| AMI in 2006 or 2007                                          | 77                                              | 164                | 134              | 118                   | 10 993             | 105                                             | 244                | 140              | 410                   | 23 786             | 10 122         |
| Dead within 28 days                                          | 36                                              | 62                 | 45               | 53                    | 3 108              | 50                                              | 88                 | 42               | 171                   | 6 467              |                |
| Lipid lowering drug therapy                                  |                                                 |                    |                  |                       |                    |                                                 |                    |                  |                       |                    |                |
| Number receiving diabetes drug therapy in 2006               | 722                                             | 1 200              | 726              | 596                   | 80 453             | 744                                             | 1 185              | 680              | 1 744                 | 116 270            | 204 320        |
| Of these, number who were given lipid lowering drugs in 2006 | 292                                             | 618                | 385              | 280                   | 45 193             | 318                                             | 631                | 367              | 743                   | 65 440             | 114 267        |

\* Individuals aged 40-79

Table 2. Relative risk of death in psychiatric patients compared with a population with no episode of treatment for mental disorder (incidence rate ratios\* with 95% confidence intervals)

| Mental disorder group                                      | All-cause mortality | Ischemic heart disease | Cancer (all types) | Avoidable mortality: Medical Care Indicators | Avoidable mortality: National Health Policy Indicators | Suicide          | Death from external causes (suicide excluded) |
|------------------------------------------------------------|---------------------|------------------------|--------------------|----------------------------------------------|--------------------------------------------------------|------------------|-----------------------------------------------|
| <b>Females</b>                                             |                     |                        |                    |                                              |                                                        |                  |                                               |
| No mental disorder                                         | 1 (REF)             | 1 (REF)                | 1 (REF)            | 1 (REF)                                      | 1 (REF)                                                | 1 (REF)          | 1 (REF)                                       |
| Schizophrenia and other non-affective psychoses            | 3.8 (3.4-4.2)       | 4.1 (3.1-5.6)          | 1.9 (1.5-2.4)      | 3.5 (2.5-4.9)                                | 2.1 (1.4-3.2)                                          | 24.9 (18.1-34.2) | 6.7 (4.0-11.1)                                |
| Affective disorder                                         | 2.4 (2.2-2.6)       | 2.1 (1.7-2.7)          | 1.3 (1.1-1.5)      | 2.2 (1.7-2.8)                                | 1.9 (1.5-2.5)                                          | 22.3 (18.1-27.3) | 6.1 (4.5-8.3)                                 |
| Anxiety disorder                                           | 2.6 (2.3-2.8)       | 2.9 (2.1-3.8)          | 1.7 (1.4-2.0)      | 2.2 (1.6-3.0)                                | 2.4 (1.8-3.2)                                          | 16.0 (12.5-20.6) | 5.3 (3.6-7.8)                                 |
| Other mental disorder (including substance abuse disorder) | 4.7 (4.3-5.0)       | 4.6 (3.6-5.8)          | 1.8 (1.5-2.2)      | 3.5 (2.7-4.6)                                | 6.2 (5.0-7.6)                                          | 26.7 (20.8-34.3) | 12.6 (9.4-17.0)                               |
| <b>Males</b>                                               |                     |                        |                    |                                              |                                                        |                  |                                               |
| No mental disorder                                         | 1 (REF)             | 1 (REF)                | 1 (REF)            | 1 (REF)                                      | 1 (REF)                                                | 1 (REF)          | 1 (REF)                                       |
| Schizophrenia and other non-affective psychoses            | 4.6 (4.2-5.0)       | 4.3 (3.4-5.3)          | 1.9 (1.5-2.5)      | 3.4 (2.4-4.9)                                | 3.0 (2.1-4.1)                                          | 16.1 (12.9-20.3) | 6.2 (4.5-8.6)                                 |
| Affective disorder                                         | 2.8 (2.7-3.1)       | 2.2 (1.9-2.7)          | 1.5 (1.2-1.7)      | 3.0 (2.4-3.8)                                | 1.4 (1.1-2.0)                                          | 17.2 (14.6-20.2) | 4.9 (3.8-6.2)                                 |
| Anxiety disorder                                           | 2.8 (2.5-3.0)       | 2.7 (2.1-3.5)          | 1.5 (1.2-2.0)      | 2.3 (1.6-3.4)                                | 2.3 (1.7-3.2)                                          | 8.3 (6.5-10.6)   | 4.5 (3.4-6.1)                                 |
| Other mental disorder (including substance abuse disorder) | 4.8 (4.6-5.0)       | 3.7 (3.3-4.2)          | 1.9 (1.6-2.1)      | 3.9 (3.3-4.6)                                | 5.5 (4.8-6.3)                                          | 12.6 (10.8-14.8) | 11.8 (10.3-13.6)                              |

\* Adjusted for age



Table 3. Associations of mental disorder and substance abuse in relation to mortality (incidence rate ratios\* with 95% confidence intervals)

| Mental disorder group                                                                   | N         | All-cause mortality | Ischemic heart disease | Cancer (all types) | Avoidable mortality: Medical Care Indicators | Avoidable mortality: National Health Policy Indicators | Suicide            | Death from external causes (suicide excluded) |
|-----------------------------------------------------------------------------------------|-----------|---------------------|------------------------|--------------------|----------------------------------------------|--------------------------------------------------------|--------------------|-----------------------------------------------|
| <b>Females</b>                                                                          |           |                     |                        |                    |                                              |                                                        |                    |                                               |
| No mental disorder                                                                      | 3 039 954 | 1 (REF)             | 1 (REF)                | 1 (REF)            | 1 (REF)                                      | 1 (REF)                                                | 1 (REF)            | 1 (REF)                                       |
| Schizophrenia and other non-affective psychoses <b>with</b> substance abuse disorder    | 502       | 10.8 (7.1-16.6)     | 5.7 (0.8-40.4)         | 5.2 (2.2-12.6)     | -                                            | 21.5 (8.9-51.8)                                        | 44.6 (14.3-138.8)  | 43.1 (13.8-134.1)                             |
| Schizophrenia and other non-affective psychoses <b>without</b> substance abuse disorder | 10 663    | 3.6 (3.2-4.0)       | 4.1 (3.0-5.6)          | 1.8 (1.5-2.3)      | 3.5 (2.5-5.0)                                | 1.7 (1.0-2.7)                                          | 24.2 (17.4-33.6)   | 5.5 (3.1-9.8)                                 |
| Affective disorder <b>with</b> substance abuse disorder                                 | 1 919     | 6.4 (4.9-8.3)       | 3.5 (1.1-10.9)         | 2.7 (1.5-4.8)      | 3.4 (1.1-10.6)                               | 6.5 (3.1-13.6)                                         | 61.1 (37.1-100.6)  | 24.1 (11.4-50.8)                              |
| Affective disorder <b>without</b> substance abuse disorder                              | 35 326    | 2.3 (2.1-2.5)       | 2.1 (1.6-2.7)          | 1.2 (1.1-1.4)      | 2.2 (1.7-2.8)                                | 1.8 (1.3-2.3)                                          | 20.3 (16.3-25.2)   | 5.4 (3.9-7.5)                                 |
| Anxiety disorder <b>with</b> substance abuse disorder                                   | 1 551     | 7.3 (5.4-9.8)       | 10.9 (4.9-24.3)        | 2.0 (0.9-4.4)      | 1.7 (0.2-12.2)                               | 6.8 (2.8-16.4)                                         | 63.1 (36.3-109.7)  | 22.9 (9.5-55.4)                               |
| Anxiety disorder <b>without</b> substance abuse disorder                                | 31 139    | 2.4 (2.2-2.7)       | 2.6 (1.9-3.5)          | 1.7 (1.4-2.0)      | 2.2 (1.6-3.0)                                | 2.2 (1.6-3.0)                                          | 13.8 (10.5-18.2)   | 4.5 (3.0-6.9)                                 |
| Other mental disorder <b>with</b> substance abuse disorder                              | 387       | 17.0 (10.4-27.7)    | -                      | -                  | 11.3 (1.6-80.4)                              | -                                                      | 171.6 (85.1-346.0) | 21.6 (3.0-153.5)                              |
| Other mental disorder <b>without</b> substance abuse disorder                           | 10 773    | 2.6 (2.3-3.0)       | 2.9 (2.0-4.1)          | 1.4 (1.1-1.8)      | 2.6 (1.8-3.8)                                | 0.9 (0.4-1.8)                                          | 10.0 (5.9-17.0)    | 1.8 (0.7-4.9)                                 |
| Substance abuse disorder without a psychiatric diagnosis                                | 9 240     | 7.9 (7.1-8.7)       | 8.4 (6.2-11.4)         | 2.4 (1.9-3.1)      | 5.3 (3.6-7.8)                                | 13.4 (10.7-16.7)                                       | 39.8 (29.8-53.2)   | 28.1 (20.5-38.5)                              |
| <b>Males</b>                                                                            |           |                     |                        |                    |                                              |                                                        |                    |                                               |
| No mental disorder                                                                      | 3 061 939 | 1 (REF)             | 1 (REF)                | 1 (REF)            | 1 (REF)                                      | 1 (REF)                                                | 1 (REF)            | 1 (REF)                                       |
| Schizophrenia and other non-affective psychoses <b>with</b> substance abuse disorder    | 1 088     | 12.5 (9.8-15.9)     | 4.9 (1.9-13.2)         | 3.8 (1.7-8.4)      | 5.3 (1.3-21.1)                               | 11 (5.2-23.1)                                          | 41.3 (25.6-66.7)   | 22.3 (12.3-40.3)                              |
| Schizophrenia and other non-affective psychoses <b>without</b> substance abuse disorder | 10 905    | 4.2 (3.8-4.6)       | 4.3 (3.4-5.3)          | 1.8 (1.4-2.4)      | 3.4 (2.3-4.9)                                | 2.5 (1.7-3.6)                                          | 13.9 (10.7-17.9)   | 4.9 (3.4-7.1)                                 |
| Affective disorder <b>with</b> substance abuse disorder                                 | 2 237     | 6.7 (5.6-8.1)       | 5.4 (3.4-8.6)          | 1.6 (0.9-3.0)      | 5.8 (3.0-11.2)                               | 5.3 (2.9-9.5)                                          | 43.7 (31.8-60.2)   | 11.3 (6.5-19.4)                               |
| Affective disorder <b>without</b> substance abuse disorder                              | 21 525    | 2.6 (2.4-2.8)       | 2.0 (1.6-2.4)          | 1.5 (1.2-1.7)      | 2.8 (2.2-3.6)                                | 1.1 (0.8-1.6)                                          | 14.5 (12.1-17.4)   | 4.3 (3.3-5.6)                                 |
| Anxiety disorder <b>with</b> substance abuse disorder                                   | 1 900     | 9.7 (7.9-11.8)      | 7.7 (4.5-13.2)         | 2.5 (1.2-4.9)      | 2.5 (0.6-10.2)                               | 8.9 (4.9-16.1)                                         | 27.7 (17.8-43.1)   | 24.8 (16.3-37.8)                              |
| Anxiety disorder <b>without</b> substance abuse disorder                                | 19 309    | 2.2 (2.0-2.5)       | 2.4 (1.8-3.1)          | 1.5 (1.2-1.9)      | 2.3 (1.6-3.4)                                | 1.8 (1.2-2.6)                                          | 6.5 (4.9-8.6)      | 2.7 (1.8-4.0)                                 |
| Other mental disorder <b>with</b> substance abuse disorder                              | 380       | 9.8 (6.7-14.4)      | 21.0 (11.3-39.0)       | 2.3 (0.6-9.1)      | 8.7 (2.2-35.0)                               | -                                                      | 47.6 (22.6-100.1)  | 10.6 (2.7-42.5)                               |
| Other mental disorder <b>without</b> substance abuse disorder                           | 9 298     | 2.5 (2.2-2.8)       | 1.7 (1.3-2.2)          | 1.4 (1.1-1.8)      | 3.5 (2.7-4.7)                                | 1.2 (0.7-2.0)                                          | 5.4 (3.5-8.4)      | 2.3 (1.4-3.9)                                 |
| Substance abuse disorder without a psychiatric diagnosis                                | 24 304    | 6.1 (5.8-6.4)       | 4.8 (4.2-5.5)          | 2.1 (1.8-2.4)      | 4.0 (3.3-5.0)                                | 7.7 (6.7-8.8)                                          | 14.8 (12.5-17.6)   | 16.1 (14.0-18.6)                              |

\* Adjusted for age

Table 4. Relative risk of mortality in psychiatric patients with substance abuse disorder (IRR with 95% confidence intervals)

|                                                       | N         | All-cause mortality | Ischemic heart disease | Cancer (all types) | Avoidable mortality: Medical Care Indicators | Avoidable mortality: National Health Policy Indicators | Suicide           | Death from external causes (suicide excluded) |
|-------------------------------------------------------|-----------|---------------------|------------------------|--------------------|----------------------------------------------|--------------------------------------------------------|-------------------|-----------------------------------------------|
| <b>Females</b>                                        |           |                     |                        |                    |                                              |                                                        |                   |                                               |
| No substance abuse disorder                           | 3 127 855 | 1 (REF)             | 1 (REF)                | 1 (REF)            | 1 (REF)                                      | 1 (REF)                                                | 1 (REF)           | 1 (REF)                                       |
| Substance abuse disorder, alcohol                     | 8 185     | 7.7 (6.9-8.5)       | 4.1 (0.6-29.3)         | 2.3 (1.8-3.0)      | 4.8 (3.2-7.2)                                | 13.8 (11.1-17.2)                                       | 29.5 (22.1-39.4)  | 22.6 (16.0-32.0)                              |
| Substance abuse disorder, drug abuse                  | 4 589     | 6.6 (5.5-8.0)       | 4.7 (2.3-9.4)          | 2.7 (1.8-4.1)      | 3.9 (1.9-8.2)                                | 6.1 (3.5-10.8)                                         | 36.9 (25.8-52.8)  | 22.9 (13.9-37.6)                              |
| Substance abuse disorder, both alcohol and drug abuse | 825       | 11.2 (8.0-15.7)     | 8.7 (6.4-11.8)         | 2.6 (1.0-6.9)      | 3.7 (0.5-26.5)                               | 7.8 (2.5-24.1)                                         | 54.4 (28.1-105.1) | 65.8 (32.7-132.4)                             |
| <b>Males</b>                                          |           |                     |                        |                    |                                              |                                                        |                   |                                               |
| No substance abuse disorder                           | 3 122 976 | 1 (REF)             | 1 (REF)                | 1 (REF)            | 1 (REF)                                      | 1 (REF)                                                | 1 (REF)           | 1 (REF)                                       |
| Substance abuse disorder, alcohol                     | 20 429    | 5.5 (5.3-5.9)       | 4.8 (4.2-5.5)          | 2.0(1.7-2.4)       | 3.8 (3.1-4.7)                                | 7.5 (6.6-8.7)                                          | 12.5 (10.4-14.9)  | 12.8 (10.8-15.0)                              |
| Substance abuse disorder, drug abuse                  | 7 753     | 9.4 (8.4-10.6)      | 5.8 (3.9-8.7)          | 2.7 (1.7-4.1)      | 4.9 (2.6-9.1)                                | 4.1 (2.4-7.0)                                          | 22.4 (17.7-28.4)  | 22.5 (18.0-28.3)                              |
| Substance abuse disorder, both alcohol and drug abuse | 1 727     | 14.5 (12.2-17.2)    | 6.8 (3.7-12.7)         | 2.5 (1.2-5.2)      | 8.7 (3.9-19.4)                               | 16.0 (10.0-25.4)                                       | 35.2 (24.2-51.2)  | 29.3 (19.6-43.9)                              |

\* Adjusted for age

**Table 5. Age-standardised percentage (with 95% confidence intervals) as measures of health care quality indicators for individuals aged 40-79, 2006**

| Mental disorder group                                      | N         | Avoidable inpatient medical care<br>% (95% CI) | Myocardial infarction - 28-day case fatality<br>% (95% CI) | Lipid lowering drug therapy<br>% (95% CI) |
|------------------------------------------------------------|-----------|------------------------------------------------|------------------------------------------------------------|-------------------------------------------|
| <b>Females</b>                                             |           |                                                |                                                            |                                           |
| No mental disorder                                         | 1 961 968 | 1.1 (1.1-1.1)                                  | 26.5 (25.7-27.3)                                           | 56.1 (55.7-56.4)                          |
| Schizophrenia and other non-affective psychoses            | 8 413     | 2.9 (2.6-3.3)                                  | 53.5 (42.0-65.0)                                           | 40.9 (36.8-45.1)                          |
| Affective disorder                                         | 22 833    | 2.4 (2.2-2.6)                                  | 34.8 (26.5-43.2)                                           | 51.9 (49.0-54.8)                          |
| Anxiety disorder                                           | 17 078    | 3.0 (2.7-3.3)                                  | 36.1 (28.8-43.4)                                           | 54.9 (50.9-58.8)                          |
| Other mental disorder (including substance abuse disorder) | 11 171    | 4.1 (3.7-4.5)                                  | 45.0 (35.8-54.3)                                           | 49.0 (44.8-53.1)                          |
| <b>Males</b>                                               |           |                                                |                                                            |                                           |
| No mental disorder                                         | 1 931 860 | 1.6 (1.5-1.6)                                  | 28.1 (27.5-28.6)                                           | 56.2 (55.9-56.5)                          |
| Schizophrenia and other non-affective psychoses            | 7 864     | 3.8 (3.3-4.4)                                  | 51.4 (40.4-62.3)                                           | 41.9 (37.2-46.5)                          |
| Affective disorder                                         | 15 502    | 3.4 (3.1-3.7)                                  | 39.2 (32.6-45.7)                                           | 53.8 (50.8-56.8)                          |
| Anxiety disorder                                           | 11 126    | 4.4 (3.9-4.9)                                  | 32.5 (23.1-42.0)                                           | 56.4 (51.9-60.8)                          |
| Other mental disorder (including substance abuse disorder) | 22 762    | 5.4 (5.1-5.7)                                  | 43.9 (38.6-49.1)                                           | 44.2 (41.7-46.7)                          |

bmjopen-2011-000778 - Quality of medical care and excess mortality in  
 psychiatric patients - a nationwide register-based study in Sweden  
 STROBE Statement—Checklist of items that should be included in reports of *cohort studies*

|                              | Item No | Recommendation                                                                                                                                                                                            |
|------------------------------|---------|-----------------------------------------------------------------------------------------------------------------------------------------------------------------------------------------------------------|
| <b>Title and abstract</b>    | 1       | (a) Indicate the study's design with a commonly used term in the title or the abstract<br><b>Page 1</b>                                                                                                   |
|                              |         | (b) Provide in the abstract an informative and balanced summary of what was done and what was found<br><b>Page 3</b>                                                                                      |
| <b>Introduction</b>          |         |                                                                                                                                                                                                           |
| Background/rationale         | 2       | Explain the scientific background and rationale for the investigation being reported<br><b>Page 4</b>                                                                                                     |
| Objectives                   | 3       | State specific objectives, including any prespecified hypotheses<br><b>Page 5</b>                                                                                                                         |
| <b>Methods</b>               |         |                                                                                                                                                                                                           |
| Study design                 | 4       | Present key elements of study design early in the paper<br><b>Page 6</b>                                                                                                                                  |
| Setting                      | 5       | Describe the setting, locations, and relevant dates, including periods of recruitment, exposure, follow-up, and data collection<br><b>Page 6</b>                                                          |
| Participants                 | 6       | (a) Give the eligibility criteria, and the sources and methods of selection of participants. Describe methods of follow-up<br><b>Page 6</b>                                                               |
|                              |         | (b) For matched studies, give matching criteria and number of exposed and unexposed<br>N/A                                                                                                                |
| Variables                    | 7       | Clearly define all outcomes, exposures, predictors, potential confounders, and effect modifiers. Give diagnostic criteria, if applicable<br><b>Page 6 - 8</b>                                             |
| Data sources/<br>measurement | 8*      | For each variable of interest, give sources of data and details of methods of assessment (measurement). Describe comparability of assessment methods if there is more than one group<br><b>Page 6 - 8</b> |
| Bias                         | 9       | Describe any efforts to address potential sources of bias<br>N/A                                                                                                                                          |
| Study size                   | 10      | Explain how the study size was arrived at<br><b>Page 6</b>                                                                                                                                                |
| Quantitative variables       | 11      | Explain how quantitative variables were handled in the analyses. If applicable, describe which groupings were chosen and why<br>N/A                                                                       |
| Statistical methods          | 12      | (a) Describe all statistical methods, including those used to control for confounding<br><b>Page 8 - 9</b>                                                                                                |
|                              |         | (b) Describe any methods used to examine subgroups and interactions<br>N/A                                                                                                                                |
|                              |         | (c) Explain how missing data were addressed<br>N/A                                                                                                                                                        |
|                              |         | (d) If applicable, explain how loss to follow-up was addressed<br>N/A                                                                                                                                     |

(e) Describe any sensitivity analyses

| <b>Results</b>           |     |                                                                                                                                                                                                                                                                                                                                                                                                                                                                 |
|--------------------------|-----|-----------------------------------------------------------------------------------------------------------------------------------------------------------------------------------------------------------------------------------------------------------------------------------------------------------------------------------------------------------------------------------------------------------------------------------------------------------------|
| Participants             | 13* | (a) Report numbers of individuals at each stage of study—eg numbers potentially eligible, examined for eligibility, confirmed eligible, included in the study, completing follow-up, and analysed<br><b>Page 10 and page 20</b><br>(b) Give reasons for non-participation at each stage<br>N/A<br>(c) Consider use of a flow diagram<br>N/A                                                                                                                     |
| Descriptive data         | 14* | (a) Give characteristics of study participants (eg demographic, clinical, social) and information on exposures and potential confounders<br><b>Page 20</b><br>(b) Indicate number of participants with missing data for each variable of interest<br>N/A<br>(c) Summarise follow-up time (eg, average and total amount)<br><b>Page 20</b>                                                                                                                       |
| Outcome data             | 15* | Report numbers of outcome events or summary measures over time<br><b>Page 10 and page 20</b>                                                                                                                                                                                                                                                                                                                                                                    |
| Main results             | 16  | (a) Give unadjusted estimates and, if applicable, confounder-adjusted estimates and their precision (eg, 95% confidence interval). Make clear which confounders were adjusted for and why they were included<br><b>Page 10-11 and page 21-23</b><br>(b) Report category boundaries when continuous variables were categorized<br>N/A<br>(c) If relevant, consider translating estimates of relative risk into absolute risk for a meaningful time period<br>N/A |
| Other analyses           | 17  | Report other analyses done—eg analyses of subgroups and interactions, and sensitivity analyses<br><b>Page 11 and page 24</b>                                                                                                                                                                                                                                                                                                                                    |
| <b>Discussion</b>        |     |                                                                                                                                                                                                                                                                                                                                                                                                                                                                 |
| Key results              | 18  | Summarise key results with reference to study objectives<br><b>Page 2 and page 12 – 16</b>                                                                                                                                                                                                                                                                                                                                                                      |
| Limitations              | 19  | Discuss limitations of the study, taking into account sources of potential bias or imprecision. Discuss both direction and magnitude of any potential bias<br><b>Page 2 and page 12</b>                                                                                                                                                                                                                                                                         |
| Interpretation           | 20  | Give a cautious overall interpretation of results considering objectives, limitations, multiplicity of analyses, results from similar studies, and other relevant evidence<br><b>Page 12 – 16</b>                                                                                                                                                                                                                                                               |
| Generalisability         | 21  | Discuss the generalisability (external validity) of the study results<br><b>Page 15</b>                                                                                                                                                                                                                                                                                                                                                                         |
| <b>Other information</b> |     |                                                                                                                                                                                                                                                                                                                                                                                                                                                                 |
| Funding                  | 22  | Give the source of funding and the role of the funders for the present study and, if applicable, for the original study on which the present article is based<br><b>Page 16</b>                                                                                                                                                                                                                                                                                 |

\*Give information separately for exposed and unexposed groups.
